## A Genetically Encoded Trimethylsilyl 1D <sup>1</sup>H-NMR Probe for Conformation Change in Large Membrane Protein Complexes

Qi Liu<sup>1,2,3,#</sup>, Qing-tao He<sup>1,3,4#</sup>, Xiao-xuan Lyu<sup>1#</sup>, Fan Yang<sup>2,3,#</sup>, Zhong-liang Zhu<sup>9#</sup>, Peng Xiao<sup>3,4</sup>, Zhao Yang<sup>2,3</sup>, Feng Zhang<sup>1</sup>, Zhao-ya Yang<sup>1,4</sup>, Xiao-yan Wang<sup>1</sup>, Peng Sun<sup>5</sup>, Qian-wen Wang<sup>5</sup>, Chang-xiu Qu<sup>3,4</sup>, Zheng Gong<sup>4</sup>, Jing-Yu Lin<sup>4</sup>, Zhen Xu<sup>1</sup>, Shao-le Song<sup>1</sup>, Shen-ming Huang<sup>3</sup>, Sheng-chao Guo<sup>3,4</sup>, Ming-jie Han<sup>1,6</sup>, Kong-kai Zhu<sup>10</sup>, Xin Chen<sup>8</sup>, Alem W. Kahsai<sup>11</sup>, Kun-Hong Xiao<sup>12</sup>, Wei Kong<sup>3</sup>, Xiao Yu<sup>2</sup>, Ke Ruan<sup>7</sup>, Fa-hui Li<sup>1</sup>, Xiao-gang Niu<sup>14</sup>, Chang-wen Jin<sup>14</sup>, Jiangyun Wang<sup>1,13\*</sup>, Jin-peng Sun<sup>3,4\*</sup>

### Affiliations:

<sup>1</sup>Institute of Biophysics, Chinese Academy of Sciences, 15 Datun Road, Chaoyang district, Beijing, 100101, China.

<sup>2</sup>Key Laboratory Experimental Teratology of the Ministry of Education and Department of Physiology, Shandong University School of Medicine, 44 Wenhua Xi Road, Jinan, Shandong, 250012, China.

<sup>3</sup>Key Laboratory of Molecular Cardiovascular Science, Ministry of Education, Peking University, 15 Xueyuan Road, Haidian District, Beijing, 100191, China.

<sup>4</sup>Key Laboratory Experimental Teratology of the Ministry of Education and Department of Biochemistry and Molecular Biology, Shandong University School of Medicine, 44 Wenhua Xi Road, Jinan, Shandong, 250012, China.

<sup>5</sup>Wuhan Institute of Physics and Mathematics, Chinese Academy of Sciences, 30 Xiaohongshan Road, Wuchang District, Wuhan, Hubei, 430071, China.

<sup>6</sup>Tianjin Institute of Industrial Biotechnology, Chinese Academy of Sciences, 32 Xiqi Road, Airport Economic Zone, Dongli District, Tianjin, 300308, China.

<sup>7</sup>Hefei National Laboratory for Physical Science at the Microscale, University of Science and Technology of China, 443 Huangshan Road, Hefei, Anhui 230027, China.

<sup>8</sup>Department of Medicinal Chemistry, School of Pharmaceutical Engineering and Life Science, Changzhou University, Changzhou, Jiangsu, 213164, China.

<sup>9</sup>School of Life Sciences, University of Science and Technology of China, 96 Jinzhai Road, Hefei, Anhui 230026, China.

<sup>10</sup>School of Biological Science and Technology, University of Jinan, 336 Nanxinzhuanxi Road, Shizhong District, Jinan 250022, China.

<sup>11</sup>Duke University, School of Medicine, Durham, North Carolina 27705, USA.

<sup>12</sup>Department of Pharmacology and Chemical Biology, School of Medicine, University of Pittsburgh, Pittsburgh, Pennsylvania 15261, USA.

<sup>13</sup>College of Life Sciences and School of Future Technology, University of Chinese Academy of Sciences, Beijing 100049, China

<sup>14</sup>Beijing Nuclear Magnetic Resonance Center, College of Chemistry and Molecular Engineering, School of Life

38 Sciences, Peking University, Beijing 100084, China

39 # These authors contributed equally to this work.

40 \* Corresponding author: Jin-Peng Sun (corresponding author)

41 E-mail: sunjinpeng@sdu.edu.cn

42 Jiangyun Wang (corresponding author)

43 E-mail: jwang@ibp.ac.cn

44

## 45 **Abstract**

46

47 **While one dimensional  $^1\text{H}$  nuclear magnetic resonance (1D  $^1\text{H}$ -NMR) spectroscopy is one of the most**  
48 **important and convenient method for measuring conformation change in biomacromolecules,**  
49 **characterization of protein dynamics in large membrane protein complexes by 1D  $^1\text{H}$ -NMR remains**  
50 **challenging, due to the difficulty of spectra assignment, low signal-to-noise ratio (S/N) and the need for large**  
51 **amount of protein. Here we report the site-specific incorporation of 4-trimethylsilyl phenylalanine (TMSiPhe)**  
52 **into proteins, through genetic code expansion in *Escherichia coli* cells, and the measurement of multiple**  
53 **conformational states in membrane protein complex by 1D  $^1\text{H}$ -NMR. The unique up-field  $^1\text{H}$ -NMR chemical**  
54 **shift of TMSiPhe, highly efficient and specific incorporation of TMSiPhe enabled facile assignment of the**  
55 **TMSiPhe  $^1\text{H}$ -NMR signal, and characterization of multiple conformational state in a 150 kilodalton (kD)**  
56 **membrane protein complex, using only 5  $\mu\text{M}$  of protein and 20 min spectra accumulation time. This highly**  
57 **efficient and convenient methods should be broadly applicable for the investigation of dynamic conformation**  
58 **change of protein complexes.**

59

## 60 **Introduction**

61

62 Membrane proteins account for about 30% of all proteins in living cells, and play critical roles such as material  
63 transportation and signal transduction. Because of their critical function in physiological processes, membrane  
64 proteins have become one of the most attractive research areas in biochemistry, biophysics and pharmaceutical  
65 industry. Indeed, knowledge about the structure and dynamics of membrane proteins is essential for effective drug  
66 design<sup>1-3</sup>. However, characterization of multiple functionally important conformation states in large membrane  
67 protein complexes has remained to be very challenging<sup>4-6</sup>.

68

69 Solution NMR is a powerful tool for studying the structure and dynamics of membrane protein complexes.  
70 The developments of isotopic labeling strategies and multi-dimensional NMR methods have facilitated the study of  
71 protein complexes up to 1 million Dalton<sup>7</sup>. However, the application of these methods, especially the assignment  
72 of complicated multidimensional spectrum is expensive and technically challenging for most biochemistry  
73 laboratories. It has recently emerged that one dimensional  $^{19}\text{F}$  nuclear magnetic resonance (1D  $^{19}\text{F}$ -NMR) is a  
74 powerful and facile method for studying dynamic conformation changes and post-translational modification of  
proteins, including tyrosine kinases and G-protein coupled receptors (GPCRs), which are among the most important

75 drug targets<sup>8-12</sup>. The advantage of this method is that, through site-specific labelling, typically only one peak is  
76 present in the 1D NMR spectra. This allows for the facile characterization of dynamic conformation change with  
77 residual precision, without requiring for time-consuming and tedious NMR signal assignment. Despite this  
78 significant progress, <sup>19</sup>F-NMR requires large amount of protein (usually more than 100 μM), and each measurement  
79 generally takes more than 12 hours. Therefore, the development of a new chemical biological approach for  
80 examination of the conformational dynamics of transmembrane protein complexes using a low concentration of  
81 protein is urgently required. However, the large chemical shift anisotropy (CSA) of <sup>19</sup>F, and the need for expensive  
82 <sup>19</sup>F cryoprobes limit the application of 1D <sup>19</sup>F-NMR to relatively low-molecular weight proteins. Moreover, this  
83 method typically requires more than 50 μM of protein samples and overnight spectra accumulation time. To address  
84 these challenges, Otting and colleagues have recently reported one-dimensional <sup>1</sup>H NMR (1D <sup>1</sup>H-NMR) tert-  
85 butyltyrosine probes. While the nine proton singlet from the tert-butyl group give rise to strong <sup>1</sup>H-NMR signals,  
86 its chemical shift around 1.3 ppm overlaps strongly with the methyl group <sup>1</sup>H-NMR signals of proteins, and is often  
87 difficult to assign. By contrast, the <sup>1</sup>H-NMR signal from trimethylsilyl (TMS) group has a chemical shift around 0  
88 ppm, that is free of other <sup>1</sup>H-NMR signal typically present in proteins. Using a cell-free translation system, and a  
89 low-efficiency, promiscuous cyanophenylalanine-tRNA synthetase, Otting *et al.* reported the site-specific labelling  
90 of proteins using 4-(trimethylsilyl)phenylalanine (TMSiPhe). However, it was observed that <sup>1</sup>H-NMR signal from  
91 TMSiPhe in labelled protein was about ten times smaller than expected, which may be attributed to limited  
92 compatibility of the cyanophenylalanine-tRNA synthetase with TMSiPhe. Indeed, no mass spectrometry result was  
93 shown to delineate the identity of the genetically incorporated amino acid, in response to UAG codon. Moreover,  
94 it was stated that cell-free translation system works best for proteins smaller than 50 kDa, and site-specific labelling  
95 of TMSiPhe on larger proteins was unsuccessful, presumably due to the lack of protein chaperons.

96 To make the 1D <sup>1</sup>H-NMR method broadly applicable for the investigation of dynamic conformation change  
97 for both small proteins and large membrane protein complexes, here we report the highly efficient and selective  
98 incorporation of TMSiPhe in proteins in *E. coli* cells. Key for the success is the identification of a mutant  
99 *Methanococcus jannaschii* tyrosyl tRNA synthetase (TyrRS), which exhibits high activity and specificity toward  
100 4-trimethylsilyl phenylalanine (TMSiPhe) in *E. coli* cells. Notably, crystallographic analysis revealed structural  
101 changes that reshaped the TMSiPhe-specific amino-acyl tRNA synthetase (TMSiPheRS) to accommodate the large  
102 trimethylsilyl (TMS) group. Through sodium dodecyl sulfate–polyacrylamide gel electrophoresis (SDS-PAGE)  
103 analysis and mass spectrometry (MS), we show that TMSiPhe is genetically incorporated into protein selectively by  
104 the UAG codon, and that the UAG codon only encode TMSiPhe. This was not demonstrated previously<sup>13</sup>. Due to  
105 the high efficiency and fidelity of TMSiPheRS, we characterized multiple conformational state in a 150 kilodalton  
106 (kD) membrane protein complex, using only 5 μM of protein and 20 min spectra accumulation time. We then  
107 applied this method to investigate the activation mechanism of arrestin, an important signal transducer downstream  
108 of most G-protein-coupled receptors (GPCRs)<sup>12,14-22</sup>.

109

110

## 111 Results

### 112 Discovery of a TMSiPhe-specific amino-acyl tRNA synthetase (TMSiPheRS)

113  
114 The genetic code expansion technique has been widely used recently to incorporate unnatural amino acids at  
115 specific positions in a protein to enable in-depth investigation of many important biological processes<sup>23-25</sup>. Such a  
116 system includes a synthetic unnatural amino acid (UAA), an orthogonal aminoacyl-tRNA synthetase (aaRS)-tRNA  
117 pair derived from directed evolution, and a host protein production organism<sup>23-25</sup>. We synthesized TMSiPhe to  
118 facilitate TMS group incorporation into protein, through an optimized route (Figure S2)<sup>26</sup>. TMSiPhe was then  
119 used for selection of a tRNA synthetase which accommodate this UAA, using a mutant library of *Methanococcus*  
120 *jannaschii* tyrosyl tRNA synthetase (*Mj*-TyrRS)<sup>27,28</sup>. The mutant library of the *Mj*-TyrRS was designed by  
121 randomizing six active site residues (Y32, L65, F108, Q109, D158 and L162) that were within 6.5 Å of the  
122 tyrosine substrate, and by performing mutating one of the six residues I63, A67, H70, Y114, I159, and V164 to G,  
123 or keeping these residues unchanged as previously described<sup>29</sup>. In the positive selection, cell survival was dependent  
124 on the suppression of an amber mutation in the chloramphenicol acetyltransferase gene in the presence of TMSiPhe.  
125 By contrast, cells were eliminated if amber codons in the barnase gene was suppressed by natural amino acids in  
126 the negative selection without TMSiPhe. Following three rounds of positive selection and two rounds of negative  
127 selection<sup>27</sup>, a mutant *M. jannaschii* tyrosyl tRNA synthetase (*Mj*-TyrRS) with specific activity toward TMSiPhe,  
128 termed TMSiPheRS, was identified. Sequence analysis revealed that the evolved TMSiPheRS harbors the  
129 mutations Tyr32His, Ile63Gly, Leu65Val, His70Gln, Asp158Gly, Ile159Gly and Val164Gly compared to wild-type  
130 *Mj*-TyrRS (Figure S3).

131 We next incorporated TMSiPhe into  $\beta$ -arrestin-1, a signaling protein used here as a model system for  
132 evaluation of the TMSiPheRS method. Protein expression was carried out in the presence of  $\beta$ -arrestin-1-H295TAG  
133 plasmid, and the pEVOL-TMSiPheRS plasmid (which encodes both TMSiPheRS and *Mj*tRNA<sub>CUA</sub><sup>Tyr</sup>) in *E. coli*  
134 grown in LB media, supplemented with 1 mM TMSiPhe. As negative controls,  $\beta$ -arrestin-1 was also expressed in  
135 the absence of any UAA, or in the presence of 1 mM other TMS group containing UAA (TMSiM-dcTyr, TMSiM-  
136 Cys, TMSiM-hCys, TMSiM-Tyr). As shown in Figure 1, full-length  $\beta$ -arrestin-1-H295TMSiPhe was expressed in  
137 good yield (around 1 mg/L after Ni-NTA affinity column purification), but no full length protein was expressed in  
138 the absence of UAA, or in the presence of other TMS group containing UAA, suggesting that TMSiPheRS exhibited  
139 good selectivity and activity for TMSiPhe (Figure 1b). Mass spectrometric analysis unambiguously showed the  
140 incorporation of TMSiPhe at H295 position in  $\beta$ -arrestin-1 with 100% selectivity (Figure 1c, Figure S4 and Table  
141 S1). To further demonstrate the efficiency and selectivity of TMSiPheRS, we expressed green fluorescent protein  
142 (GFP) harboring TMSiPhe in the Y182 position (GFP-Y182TMSiPhe). Crystallization of GFP-Y182TMSiPhe takes  
143 approximately 1 week at 16 °C, followed by X-ray diffraction in Shanghai synchrotron facility. As Figure 1d shows,  
144 the TMS group electron density is clearly resolved in the GFP-Y182TMSiPhe crystal structure. These results  
145 further demonstrate the high efficiency and fidelity of TMSiPheRS mediated TMSiPhe incorporation, and that  
146 TMSiPhe exhibit good stability and compatibility with proteins, which are important for protein structure studies.

147 We then inspected the 1D <sup>1</sup>H-NMR properties of the TMSiPhe decorated protein. 1D <sup>1</sup>H-NMR NMR spectroscopy  
148 of β-arrestin-1-H295TMSiPhe revealed a unique <sup>1</sup>H-NMR peak at 0.25 ppm, which is well separated from the other  
149 endogenous <sup>1</sup>H-NMR signals from β-arrestin-1, providing a distinct NMR probe for the examination of the  
150 structural dynamics of a specific site (Figure 1e and Figure S5). Notably, the <sup>1</sup>H-NMR signal of TMSiPhe-  
151 incorporated arrestin can be detected at concentrations as low as 5 μM very rapidly (in less than 20 min) using a  
152 950 MHz NMR spectrometer. This high sensitivity is due to the nine equivalent proton present in the TMS group,  
153 and the usage of a high-field NMR spectrometer. By contrast, the large chemical shift anisotropy (CSA) of <sup>19</sup>F in  
154 general limit the <sup>19</sup>F-NMR studies of proteins to NMR spectrometers lower than 600 MHz. The high sensitivity of  
155 the TMSiPhe probe is important for 1D <sup>1</sup>H-NMR studies, especially for large membrane proteins complexes since  
156 they are prone for aggregation in high concentration.

157

### 158 **Molecular basis of the selective recognition of TMSiPhe by TMSiPheRS**

159

160 To investigate the molecular basis of the selective recognition of TMSiPhe by TMSiPheRS, we crystallized  
161 TMSiPheRS and analyzed the structures by X-ray crystallography. The crystal structures of TMSiPheRS alone and  
162 the complex of TMSiPheRS with TMSiPhe were determined at 1.8 Å and 2.1 Å, respectively (Table S2). The 2Fo-  
163 Fc annealing omit map of the TMSiPheRS/TMSiPhe complex unambiguously assigned the electron density for  
164 TMSiPhe (Figure 2a). Introduction of the TMS group significantly increased the volume of the amino acid substrate  
165 by approximately 60% (Figure 2b). To compensate for this substantial change in volume, three residues, namely,  
166 Asp158, Ile159 and Val164, were replaced by the smallest amino acid Gly, and Tyr32 and Leu65 were substituted  
167 by the relatively small residues His32 and Val65, respectively (Figure 2b-2c and Figure S3). We then compared the  
168 crystal structure of the TMSiPheRS/TMSiPhe complex with that of apo TMSiPheRS. Compared to the structure of  
169 TMSiPheRS alone, we observed a dramatic 120-degree rotation of histidine 32 in response to TMSiPhe binding.  
170 Moreover, Leu162 rotated approximately 42 degrees to form hydrophobic interactions with the methyl groups of  
171 TMSiPhe (Figure 2d). Altogether, Gly34, Val65, Gln70, Phe108, Gln109, Tyr151, Gln155, Gly158, Gly159,  
172 Gln173 and His177 defined a hydrophobic pocket for the accommodation of and specific interactions with the  
173 phenyl ring and TMS group of TMSiPhe (Figure 2c and Figure S3). These observations provided a structural basis  
174 for specific and efficient incorporation of TMSiPhe using evolved TMSiPheRS.

175

### 176 **Incorporation of TMSiPhe at specific sites in β-arrestin-1 enabled characterization of β-arrestin-1 activation**

177

178 We then incorporated TMSiPhe into functionally relevant structural motifs of β-arrestin-1, the key signal  
179 transducer downstream of almost all 800 GPCRs encoded in the human genome, which functions not only by  
180 desensitizing membrane receptors but also by mediating independent downstream signaling after receptor  
181 activation<sup>12,14-22,30</sup>(Figure 3a and 3b). Although the functions of many arrestin-mediated receptors have been  
182 identified and certain motifs of arrestin are suspected to be involved in specific signaling pathways (Table S3), the  
183 correlation between the conformational states of these arrestin motifs and selective receptor functions remains to

184 be elucidated. Incorporation of TMSiPhe into  $\beta$ -arrestin-1 at specific positions, including the receptor-phosphate-  
185 binding site (Y21), the finger loop (Y63), the hinge region (Y173), the  $\beta$ -strand XVI (Y249), the loop between  $\beta$ -  
186 strands XVIII and XVIII (R285), the lariat loop (H295) and the C-terminal swapping region (F388), led to  
187 unambiguous assignment of NMR peaks between -0.3 ppm and 0.3 ppm in the  $^1\text{H-NMR}$  spectrum (Figure 3b,  
188 Figure S6-S7 and Table S4). These positions were proposed to be associated with specific arrestin functions,  
189 including receptor or IP6 interactions, or the activation of downstream ERK or AP2 but have never been fully  
190 characterized by biophysical methods (Table S3). Therefore, TMSiPhe-containing  $\beta$ -arrestin-1 proteins provide a  
191 useful tool for monitoring conformational changes in arrestin in response to receptor activation or other stimuli.  
192 For example, the  $^1\text{H-NMR}$  spectrum of native  $\beta$ -arrestin-1 F388-TMSiPhe exhibits a peak at -0.05 ppm, which can  
193 be easily identified. By contrast, when another UAA, O-tert-butyltyrosine<sup>13,31</sup>, was genetically encoded into the  
194 same position, the peaks for which cannot be assigned due to strong overlap with the methyl signals from the  
195 protein (Figure S8). Notably, in response to stimulation with increased concentrations of phospho-vasopressin-2  
196 receptor-C-tail peptide (V2Rpp), the peak at -0.05 ppm gradually disappears, whereas a  $^1\text{H-NMR}$  peak at 0.15 ppm  
197 appears, reflecting the transition of the “inactive” arrestin conformation to an “active” arrestin conformation at the  
198 F388 position, through dislodgement of this specific C-terminal swapping segment (Figure 3c and 3d). Moreover,  
199 the Scatchard plot for the titration experiment performed to examine the binding of V2R-phospho-C-tail to  $\beta$ -  
200 arrestin-1 exhibits a straight line with a regression coefficient of 0.99. The calculated  $K_D$  value for the interaction  
201 of V2Rpp with  $\beta$ -arrestin-1 was  $6.9 \pm 0.2 \mu\text{M}$  (Figure 3e and Figure S9). Here, we demonstrate that while the genetic  
202 incorporation of TMSiPhe introduce little perturbation to the target protein, it can be used as a convenient tool for  
203 determining protein/peptide binding affinities. Since the 1D  $^1\text{H-NMR}$  spectra contain only two peaks which  
204 represent the “active” and “inactive” conformation, it takes no effort to perform NMR spectra assignment.  
205 Moreover, since  $^1\text{H-NMR}$  is easily accessible to most universities, our method is broadly applicable to most  
206 biochemistry laboratories, without requiring for a strong expertise in NMR spectra assignment and  
207 multidimensional NMR experiments.

208

### 209 **Observation of the conformational change of the polar core of $\beta$ -arrestin-1 by different GPCR ligands** 210 **through TMSiPhe**

211

212 Arrestin is known to be activated via both receptor-phosphorylation and active seven transmembrane 7TM  
213 core<sup>8,12,15-18,32-37</sup> (Figure 4a). While the recent rhodopsin/visual arrestin complex structure has provided a model of  
214 the interactions of the receptor core with arrestin at an atomic resolution<sup>37</sup>, there is little structural information  
215 regarding receptor core-induced structural rearrangement of arrestin at the residue level due to technological  
216 difficulties in distinguishing the contributions of the receptor core, the receptor-phospho-tail, or the linker and  
217 arrestin mutant used in the crystal structures individually, as well as the large amount of the receptor complex  
218 required for structural delineation.

219 Thus, incorporation of TMSiPhe at specific positions in arrestin might facilitate detection of ligand-induced  
220 conformational changes in arrestin using 1D  $^1\text{H-NMR}$ . One hallmark of arrestin activation is the approximately 20-

221 degree twist between the N- and C-domains of the protein (Figure 4a). In the inactive state, the N- and C-domains  
222 of  $\beta$ -arrestin-1 are tethered by the polar core, which is composed of the extensive charged interactions of Asp26,  
223 Arg169, Asp290, Asp297 and Arg393 (Figure S10). Disruption of the salt bridge between Asp297 and Arg393 and  
224 that between Asp304 and Arg382, as well as the equivalent rhodopsin-visual arrestin interactions between Asp296  
225 and Arg175 and Asp303 and Arg382, are known to activate arrestin<sup>37</sup>(Figure S10). Notably, the results of recent  
226 molecular dynamics studies have indicated that the rotation of Asp296 of visual arrestin (Asp290 in  $\beta$ -arrestin-1)  
227 is closely associated with interdomain twisting. We therefore incorporated TMSiPhe at the H295 position, which  
228 is close to both D290 and D297 of  $\beta$ -arrestin-1, to monitor the receptor-induced conformational changes in the  
229 polar core (Figure 4a-4b and Figure S10). Specific incorporation of TMSiPhe at the H295 position in  $\beta$ -arrestin-1  
230 did not impair the structural integrity of the protein, as H295-TMSiPhe- $\beta$ -arrestin-1 exhibited normal activation in  
231 response to the V2-receptor-phospho-tail interaction (Figure S11). For structural validation of the TMSiPheRS  
232 study with H295-TMSiPhe- $\beta$ -arrestin-1, we performed <sup>1</sup>H-NMR measurements using the conditions for the crystal  
233 structures of  $\beta$ -arrestin-1 in both the inactive apo-arrestin and in active arrestin stabilized by vasopressin 2 receptor  
234 phospho-tail (V2Rpp) and the conformationally selective antibody Fab30<sup>35</sup>. Notably, in the “two-step arrestin  
235 recruitment model of the receptor”, V2Rpp/ $\beta$ -arrestin-1 mostly exhibited the “hanging” mode, whereas the  
236 phospho-receptor/ $\beta$ -arrestin-1 complex encompassing the core interaction represented the “snuggly”  
237 mode<sup>32,35</sup>(Figure 4a). Superimposition of the inactive and active arrestin structures revealed that both the “hanging”  
238 and “snuggly” modes of active arrestin had similar conformations at the H295 position, differing significantly from  
239 the modes of inactive arrestin, which featured considerable movement of the lariat loop (Figure 4b).

240 In the inactive state, the 1D <sup>1</sup>H-NMR spectrum of H295-TMSiPhe- $\beta$ -arrestin-1 contained mainly one peak at  
241 0.25 ppm, which was designated S1 (Figure 4c). Upon the addition of increasing the concentration of V2Rpp, the  
242 peak volume of S1 gradually decreased, accompanied by the growth of a new peak at 0.15 ppm, which was  
243 designated S2. The 1D <sup>1</sup>H-NMR spectrum obtained with a saturating concentration of V2Rpp mainly exhibited an  
244 S2 peak, indicating that S2 represented an active state of H295TMSiPhe, whereas S1 represented the inactive state  
245 of  $\beta$ -arrestin-1 H295TMSiPhe (Figure 4b and 4c).

246 We then inspected the conformational change at the H295 site in response to occupation of the receptor by a  
247 panel of ligands with the same phospho-receptor-tail by using the  $\beta$ 2 adrenergic receptor ( $\beta$ 2AR) as a prototypic  
248 model. As previously described, we obtained the phospho- $\beta$ 2AR-V2-tail chimera (pp $\beta$ 2V2R) by stimulating Sf9  
249 cells with ISO (Isoproterenol), a low-affinity ligand, before harvesting the cells and washing out the residual ligands  
250 by affinity chromatography<sup>38</sup>. The purified pp $\beta$ 2V2R was then incubated with various ligands and then used to  
251 form a stable receptor/arrestin complex by further incubation with  $\beta$ -arrestin-1 and the conformationally selective  
252 antibody fragment Fab30 (Figure S12). Complex formation was verified by size-exclusion chromatography, and  
253 1D <sup>1</sup>H-NMR was performed to monitor changes in the NMR signal (Figure 4d). Application of the arrestin active  
254 conformation stabilizing Fab30 alone had no significant effect on the NMR spectrum of  $\beta$ -arrestin-1 H295TMSiPhe  
255 (Figure S13). Notably, upon incubation with pp $\beta$ 2V2R and Fab30, a new NMR signal appeared at 0.07 ppm  
256 (designated S3), which was associated with the decrease in the S1 peak (Figure 4d and Figure S14-S15). Therefore,  
257 S3 may represent the active arrestin state of H295TMSiPhe in the presence of pp $\beta$ 2V2R,. The sharp S3 peak

258 compared to S1 might indicate a highly solvent-exposed structure of the H295 state in  $\beta$ -arrestin-1 after forming  
259 the complex with the pp $\beta$ 2V2R, as observed in the crystal structure of the rhodopsin/visual arrestin complex.  $^1\text{H}$ -  
260 NMR chemical shift is sensitive to the change of hydrogen bonding, local dielectric constant, and nearby aromatic  
261 residues. Thus, NMR chemical shifts are sensitive to subtle structural changes in proteins. The S2 and S3 states  
262 have similar loop structures, but subtle differences in sidechain orientation are obvious (Figure 4b).

263 We next examined the 1D  $^1\text{H}$ -NMR spectrum of the pp $\beta$ 2V2R/ $\beta$ -arrestin-1 complex in the presence of various  
264  $\beta$ 2AR ligands exhibiting different pharmacological activities. Importantly, while the S1 state population of  
265 H295TMSiPhe decreased upon addition of various agonists, including the full agonists ISO and BI-167107, or the  
266 partial agonists Clenbuterol (Clen) and Salmeterol (Salm), the S3 state population increased (Figure 4e and Figure  
267 S15-S16). By contrast, the neutral antagonist Alprenolol (Alp) showed no effect on the S3 state, whereas the inverse  
268 antagonist ICI-118551 (ICI) reduced the population of the S3 state (Figure 4d and Figure S15). Moreover, the  
269 volume of the S3 state corresponds to the potency of the ligand in inducing receptor internalization (Figure 4e and  
270 Figure S17). These trends mirrored the ability of the ligand to promote torsion between helix VI and helix III, a  
271 hallmark of the conformational changes in the receptor 7-transmembrane core induced by agonists (Figure 4f and  
272 Figure S18). Overall, the 1D  $^1\text{H}$ -NMR spectrum of  $\beta$ -arrestin-1 H295TMSiPhe indicated that the conformational  
273 changes in the polar core of the arrestin in response to ligand properties are associated with the abilities of these  
274 ligands to promote receptor internalization in the presence of the same receptor (Figure 4e-4f and Figure S17).

275

### 276 **The role of the receptor 7TM core in mediating the ligand-regulated conformational change in the polar core** 277 **of $\beta$ -arrestin-1**

278

279 To confirm that the observed S3 signal in the 1D  $^1\text{H}$ -NMR spectrum was dependent on the interaction of  $\beta$ -  
280 arrestin-1 with the receptor core, we performed a competition assay using a well-characterized binding partner of  
281 the receptor 7-transmembrane core, namely, the  $G\alpha$  protein C-tail ( $G\alpha$ -CT) (Figure 5a). Moreover, direct  
282 engagement of the  $\beta$ -arrestin-1 finger loop and  $G\alpha$ -CT of G-protein serves as a major interaction interface with the  
283 receptor 7-transmembrane core, which was supported by recent cross-linking and electron microscopic studies<sup>35,39-  
284 41</sup>. Therefore, we prepared the ISO/pp $\beta$ 2V2R/ $\beta$ -arrestin-1/Fab30 complex in the presence of  $G\alpha$ -CT. Incubation  
285 with  $G\alpha$ -CT did not disrupt the ISO/pp $\beta$ 2V2R/ $\beta$ -arrestin-1/Fab30 complex, as the presence of  $G\alpha$ -CT did not alter  
286 the SEC (size-exclusion chromatography) profile (Figure 5b). Notably, while incubation of  $G\alpha$ -CT with  $\beta$ -arrestin-  
287 1-H295-TMSiPhe led to no significant alteration in the 1D  $^1\text{H}$ -NMR spectrum, addition of  $G\alpha$ -CT with the  
288 ISO/pp $\beta$ 2V2R/ $\beta$ -arrestin-1/Fab30 complex significantly decreased the S3 state and increased the S1 state,  
289 suggesting that the observed S1 state reduction was mainly due to elimination of the receptor core interaction with  
290  $\beta$ -arrestin-1 by the binding of  $G\alpha$ -CT (Figure 5c). Because H295 is located in the close proximity to the polar core  
291 residues Asp290 and Asp297 of  $\beta$ -arrestin-1, the 1D  $^1\text{H}$ -NMR spectrum obtained from  $G\alpha$ -CT competition  
292 experiments with H295-TMSiPhe- $\beta$ -arrestin-1 confirmed that the agonist ISO was able to induce conformational  
293 changes in the polar core of  $\beta$ -arrestin-1 via direct transmembrane core interactions.

294 As both the receptor core and the phosphorylated receptor C-tail contributed to the interaction between



295 ppβ2V2R and arrestin, we next performed a V2R-phospho-C-tail competition experiment (Figure 5d). Incubation  
296 of the excess V2Rpp led to the dissociation of ppβ2V2R from the ISO/ppβ2V2R/β-arrestin-1/Fab30 complex, as  
297 suggested by the SEC results (Figure 5e). However, the active conformation of H295 persisted even when the  
298 arrestin dissociated from the receptor, as indicated by the maintenance of the amplitude of the S3 state in the 1D  
299 <sup>1</sup>H-NMR spectrum (Figure 5f). These data suggested that the S3 conformational state of H295 in arrestin do not  
300 simply reflect the propensities of the ligands for stabilization of the GPCR-arrestin complex, but is a consequence  
301 of the receptor-core-arrestin interaction. Furthermore, maintenance of the S3 activation state of arrestin even after  
302 dissociation from the receptor was consistent with the hypothesis proposed in recent cellular studies, which  
303 suggested that an arrestin activation cycle occurred in response to activation by the receptor.

304

### 305 **Multiple conformational states observed at the ERK interaction site of β-arrestin-1**

306

307 We next extended the TMSiPhe technology to study the conformations of other β-arrestin-1 sites associated  
308 with specific arrestin functions. We selected the R285 position of β-arrestin-1, which was hypothesized to play  
309 important roles in interaction with ERK<sup>42</sup>(Figure 3a and Table S3). Notably, superimposition of the structures of  
310 inactive β-arrestin-1 structure and the rhodopsin-visual arrestin complex indicated that R285 assumed a highly  
311 exposed and extended conformation (Figure 6a), suggesting that receptor interaction may regulate conformational  
312 change at this specific site.

313 We therefore incorporated TMSiPhe at the R285 site of β-arrestin-1 and monitored the change in the 1H-NMR  
314 spectrum in response to the binding of ppβ2V2R engaged with different ligands (Figure 6b and Figure S19-S21).  
315 The functional integrity of R285TMSiPhe-β-arrestin-1 was validated, and Fab30 was used to stabilize the  
316 ppβ2V2R/β-arrestin-1 complex without perturbation in the NMR spectrum (Figure S11 and S19). Application of  
317 ppβ2V2R without or with different ligands eliminated the original NMR peak at 0.158 ppm but broadened the  
318 conformational distributions from 0.03 ppm to 0.10 ppm (Figure 6b-6c and Figure S21). At least 4 different  
319 conformational states of the ppβ2V2R/β-arrestin-1-R285TMSiPhe/Fab30 complex were discerned in the presence  
320 of different ligands. Notably, β-arrestin-1 alone also has small but visible peaks in the 0.03 ppm-0.10 ppm region,  
321 indicating that a conformational selection model may also be suitable for description of the receptor-induced  
322 conformational change at the β-arrestin-1-R285 position. In particular, addition of any receptor complexes without  
323 or with different ligands all produced a similar peak at 0.09 ppm (R0 state), indicating that this conformational state  
324 may be mainly due to the binding of the receptor-phospho-tail but is not significantly affected by the receptor core  
325 interaction (Figure 6b and Figure S21).

326 The ligands mostly changed the distribution of NMR peaks from 0.04 ppm to 0.07 ppm, which included 3  
327 conformational states derived by simulation, namely, R1a-b (0.065-0.068 ppm) and R2 (0.05 ppm). Although  
328 application of the neutral antagonist Alp and the agonist ISO had no significant effect on the NMR peak at R1a  
329 (0.065 ppm), application of the long-term covalent agonist BI caused a small but significant low field shift of R1a  
330 to R1b (0.068 ppm).

331 The application of partial and inverse agonists caused complex conformational changes. Whereas Clen

332 significantly diminished the distribution of the R1a state and promoted the appearance of a high-field R2 state, the  
333 engagement of the receptor with the G-protein-biased partial agonist Sal and the inverse agonist ICI almost  
334 completely eliminated the presence of the R1 states and facilitated the emergence of the R2 states (Figure 6b-6c  
335 and Figure S21). As Sal and ICI are not known for arrestin-dependent ERK signaling, the appearance of the R2  
336 conformational states of the  $\beta$ -arrestin-1 R285 position may not contribute to ERK activation in response to  
337 receptor/arrestin complex interactions. Taken together, multiple conformational states of the  $\beta$ -arrestin-1 R285  
338 position were detected by TMSiPhe in response to different  $\beta$ 2AR ligands, which was not strictly correlated with  
339 the ability of these ligands in either the activation of G-protein (agonists vs. antagonists) or arrestin-mediated  
340 receptor internalization, indicating that each specific receptor ligand may lead to a distinct conformational state at  
341 a specific arrestin site, which contributes to the selective functions of these ligands.

342

## 343 Discussion

344

345 Despite the broad applications of NMR in the characterization of protein structure and dynamics, it has  
346 remained very challenging to use NMR to study large transmembrane protein complexes, whose NMR spectra  
347 exhibit severe line broadening and overlapping resonance. While site-specific protein labelling with 1D NMR probe  
348 has provided an exciting new method for the investigation of membrane protein complex<sup>8,9,43-45</sup>, one limitation of  
349 cysteine-mediated chemical labeling is that it only allows access to the surface residues of proteins, preventing  
350 observation of the important dynamic interactions that occur within protein hydrophobic cores. Moreover, to  
351 achieve site-specific labelling, all other surface-exposed cysteine residues must be mutated, which may cause  
352 significant perturbation to protein structure and function. By contrast, UAA incorporation through genetic code  
353 expansion allows labeling of desired residues at both exposed and internal sites. For example, through genetic code  
354 expansion, we have developed a method to efficiently incorporate the UAA difluorotyrosine (F2Y) into proteins of  
355 interest, enabling us to study how different receptor phospho-barcodes localized in the receptor C-tail regulate  
356 distinct functionally selective arrestin conformations<sup>12,16</sup>. Despite this significant progress, <sup>19</sup>F-NMR requires large  
357 amount of protein (usually more than 100  $\mu$ M), and each measurement generally takes more than 12 hours.  
358 Therefore, the development of a 1D NMR probe for the examination of the conformational dynamics of  
359 transmembrane protein complexes using a low concentration of protein is urgently needed.

360 Through genetic code expansion in *E. coli*, we have achieved the highly selective and efficient labelling of  
361 trimethylsilyl (TMS) group in proteins, and demonstrated its broad applicability to investigate multiple  
362 conformation state of large membrane protein complexes. The efficient and selective incorporation of TMSiPhe  
363 was verified by both mass spectrometry and crystallography. Using this method, we were able to detect the dynamic  
364 conformational changes in membrane protein complex (molecular weight  $\sim$  150 kDa) at the residue level, using a  
365 low protein concentration ranging of 5  $\mu$ M, and a short spectra accumulation time of 20 min. Key to this  
366 advance is the evolution of TMSiPheRS, a specific tRNA synthetase which selectively recognizes TMSiPhe to  
367 facilitate its genetic incorporation into proteins.

368 Using this method, we were able to observe the ligand-dependent conformational changes in arrestin via direct

369 receptor core engagement, a process important for GPCR signaling. Previous studies by us and others have provided  
370 important mechanistic insights, demonstrating that receptor-phospho-barcodes present in the receptor-C-tail play  
371 pivotal roles in the determination of selective arrestin functions<sup>12,16-18,32,33,35,46</sup>. An important model for the  
372 development of arrestin-biased GPCR ligands is that ligands for GPCRs can cause conformational changes in  
373 arrestin via direct receptor core/arrestin interactions regardless of the C-terminal phosphorylation pattern. Notably,  
374 the rhodopsin/visual arrestin complex crystal structure provided knowledge of receptor core/arrestin interactions at  
375 the atomic level<sup>3</sup>, and the FIAsh-BRET assays revealed that different receptor activation resulted in diverse arrestin  
376 conformations in cells<sup>17</sup>. However, dynamic information and high-resolution data regarding conformational  
377 changes in arrestin dictated by different receptor ligands via the receptor core/arrestin interaction remains  
378 undetermined, likely due to the low resolution of cellular methods and the difficulty of the application of  
379 biophysical approaches for the study of receptor complex systems. Here, through the residue-specific  
380 conformational detection method using TMSiPheRS, as well as cellular internalization assays, our results reveal  
381 that ligands directed structural alterations of the 7-helix transmembrane core of the GPCR interacts with arrestin to  
382 cause conformational change in the arrestin polar core, and the extent of which is correlated with the internalization  
383 ability of the receptor/arrestin complex.

384 In addition to structural alterations in the polar core, we used TMSiPhe to examine the conformational changes  
385 that occurred at the R285 position of  $\beta$ -arrestin-1, a site associated with ERK activation<sup>42</sup>. Importantly,  
386 R285TMSiPhe assumed multiple conformations in response to the engagement of different ligands with  $\beta$ 2V2R  
387 harboring the same phosphorylated receptor C-tail. Importantly, the conformational states of the 285 site are not  
388 directly correlated to the functions of these  $\beta$ 2AR ligands in either Gs activation or receptor internalization,  
389 indicating that different ligands of the same receptor were able to regulate distinct arrestin conformations at specific  
390 arrestin sites, which may be correlated with selective functions. Notably, the arrestin-ERK interaction may involve  
391 multiple interfaces. Therefore, the conformational changes in the R285 site observed by TMSiPhe likely contribute  
392 to, but are not the sole determinants of, arrestin-mediated ERK activation.

393 In summary, we have achieved the efficient and selection incorporation of TMSiPhe into protein in *E. coli*, to  
394 facilitate rapid detection of the dynamic conformational changes in 150 kD membrane protein complexes, using  
395 1D <sup>1</sup>H-NMR. Due to the high <sup>1</sup>H-NMR signal intensity, and unique up-field chemical shift of the TMS group, good  
396 1D <sup>1</sup>H-NMR spectra can be acquired using only 5  $\mu$ M of protein, and 20 min accumulation time. Using this handy  
397 and powerful approach, we identified the ligand-induced and functionally relevant arrestin conformational states  
398 via receptor core engagement<sup>47</sup>. We expect this method will be broadly applicable to biochemistry laboratories to  
399 decipher dynamic protein interaction mechanism under physiological conditions.

400

## 401 **Methods**

402

## 403 **Reagents**

404

405 The monoclonal anti-GST (2622), anti-His (2366S) antibodies were purchased from Cell Signaling. The

406 monoclonal anti-Flag M2 antibody (F3165) were purchased from Sigma. Anti -BV envelope gp64 PE antibody  
407 (12-6991-80) was purchased from eBioscience. Glutathione-Sepharose 4B and Ni-NTA Agarose were from  
408 Amersham Pharmacia Biotech., Isoproterenol, Alprenolol, Clenbuterol, Salmaterol and ICI-118551 were purchased  
409 from MCE. BI-167107 was synthesized by Prof. Xin Chen at Changzhou University. V2Rpp were synthesized by  
410 Tufts University core facility. Flag M1 antibody were produced by Flag-M1 hybridoma cell and purified by Protein  
411 A/G beads. All of the other reagents were from Sigma.

412

### 413 **Constructs**

414

415 The full-length wild-type cDNAs of bovine  $\beta$ -arrestin-1 was subcloned into the NdeI/XhoI sites of the pET22b  
416 vector with the C-terminal His tag. The  $\beta$ -arrestin-1 mutations Y21TAG, Y63TAG, Y173TAG, Y249TAG,  
417 R285TAG, H295TAG, L388TAG, sfGFP Y182 TAG were generated using the Quikchange mutagenesis kit  
418 (Stratagene). The pFast- $\beta$ 2V2R construct was created by in-fusion of the last 29 amino acid cDNA of human V2-  
419 Vasopressin receptor (V2R) into the pFast- $\beta$ 2AR construct has been described previously<sup>12,48</sup>. The pcDNA3.1-Flag-  
420  $\beta$ 2V2R-Rluc was created by in-fusion of the Rluc plasmid with the pcDNA3.1- Flag- $\beta$ 2V2R construct. All  
421 constructs and mutations were verified by DNA sequencing.

422

### 423 **Synthesis of TMSiPhe**

424

425 The synthesis of TMSiPhe according to the route in fig. S2, with following steps<sup>26</sup>.

426 Synthesis of trimethyl(4-tolyl) silane (2).

427 Iodine (catalytic amount) was added to the mixture of Magnesium turning (2.67 g, 110 mmol) and 4-bromotoluene  
428 1 (1.71 g, 10 mmol) in 80 ml of dry tetrahydrofuran (THF (containing 0.002% water). The reaction was started by  
429 heating, then 4-bromotoluene (1) (15.4 g, 90 mmol, dissolved in 20 mL of dry THF) was slowly added in a drop  
430 wised manner. After refluxing for 4h, the reactions were kept slight boiling by the drop wised addition of trimethyl  
431 chlorosilane (12.7 ml, 110 mmol). The mixture were reflux for another 2 h, followed by stirring at room temperature  
432 and quenching with 500 ml ice-cold water. The mixture was extracted with ethyl acetate (EA, 100 mL\*3) and the  
433 organic layers were combined and subsequently washed with brine (100 mL\*3). The organic layer was then dried  
434 over Na<sub>2</sub>SO<sub>4</sub>, filtered and evaporated. The residue was chromatographed by silica gel with petroleum ether (PE)  
435 as an eluent. The colorless liquid (14.3 g) was obtained with 87% yield.

436 <sup>1</sup>H NMR (500 MHz, CDCl<sub>3</sub>)  $\delta$  7.45 (d, J = 7.6 Hz, 2H), 7.21 (d, J = 7.4 Hz, 2H), 2.38 (s, 3H), 0.28 (s, 9H).

437 Synthesis of (4-(bromomethyl) phenyl) trimethylsilane (3)

438 Trimethyl(4-tolyl) silane (2) (3.28 g, 20 mmol) was dissolved in tetrachloromethane (CCl<sub>4</sub>, 50 mL, A.R. grade) at  
439 room temperature. N-bromosuccinimide (NBS, 3.56 g, 20 mmol) and azodiisobutyronitrile (AIBN, 0.33 g, 2 mmol)  
440 was added. The mixture was stirred with 4hours refluxing, followed by vacuum condensation. The residue was  
441 used for the next step without further purification.

442 <sup>1</sup>H NMR (500 MHz, CDCl<sub>3</sub>) δ 7.51 (d, J = 7.9 Hz, 2H), 7.38 (d, J = 7.9 Hz, 2H), 4.51 (s, 2H), 0.28 (s, 9H).

443 Synthesis of ethyl 2-((diphenylmethylene)amino)-3-(4-(trimethylsilyl) phenyl) propanoate (4)

444 N-(Diphenylmethylene)glycine ethyl ester (13.37 g, 50 mmol) and potassium hydroxide (8.42 g, 150 mmol) was  
445 dissolved in 60 ml DMSO and the mixture was stirred at 10°C for 20 min. The mixture was added with (4-  
446 (bromomethyl) phenyl) trimethylsilane (3) (12.15 g, 50 mmol) and kept stirring for 1 h, following by adding 720  
447 ml of ice-cold water and then extracting with EA (200 ml\*3). The organic layers were combined and were  
448 subsequently washed with brine (100 mL\*3). The organic layer was then dried over Na<sub>2</sub>SO<sub>4</sub>, filtered, and  
449 concentrated under reduced pressure.

450 Synthesis of ethyl 2-amino-3-(4-(trimethylsilyl) phenyl) propanoate (5)

451 The residue from preceding step was added with THF 60 ml and 1N HCl aqueous 60ml. The solution was stirred  
452 for 1 h and then was added with 180 ml of PE, washed with PE/diethyl ether (3:1) (200 ml\*3). The organic phase  
453 was extracted with 0.1N HCl aq (100 ml\*3). Then the aqueous phase was combined and alkalized with Na<sub>2</sub>CO<sub>3</sub>  
454 to pH= 9~10 and extracted with EA (100 mL\*3). The final organic layers were combined and subsequently washed  
455 with brine (100 mL\*3), dried over Na<sub>2</sub>SO<sub>4</sub> and concentrated. 8.1 g compound 5 was acquired finally. The yield  
456 for the product is approximately 60% over these 3 steps.

457 <sup>1</sup>H NMR (500 MHz, CDCl<sub>3</sub>) δ 7.44(d, J = 7.7 Hz, 2H), 7.27 (d, J = 7.7 Hz, 2H), 4.43 (s, 1H), 4.14 (q, J = 6.8 Hz,  
458 2H), 3.49 (m, 1H), 3.38 (m, 1H), 1.15 (t, J = 6.9 Hz, 3H), 0.24 (s, 9H).

459 Synthesis of 2-amino-3-(4-(trimethylsilyl) phenyl) propanoic acid (6)

460 7.9 g of Ethyl 2-amino-3-(4-(trimethylsilyl)phenyl)propanoate (5) (30 mmol) was added with THF 30 ml and 2N  
461 NaOH aqueous 30 ml. The mixture was then stirred for overnight at room temperature, followed by adding 300 ml  
462 of PE. Then the aqueous phase was added to 600 ml of 0.1N HCl aq in a drop wise manner with stirring. A lot of  
463 white solid was precipitated from the solution. The product was filtered and dried under vacuum to afford the 2-  
464 amino-3-(4-(trimethylsilyl) phenyl) propanoic acid (5.6 g, 78%).

465 <sup>1</sup>H NMR (500 MHz, D<sub>2</sub>O) δ 7.48 (d, J = 6.6 Hz, 2H), 7.19 (d, J = 6.6Hz, 2H), 3.39 (m, 1H), 2.91 (m, 1H), 2.72(m,  
466 1H), 0.14 (s, 9H). <sup>13</sup>C NMR (100 MHz, MeOD-d<sub>3</sub>) δ 172.28, 140.70, 136.82, 135.05, 129.88, 55.99, 37.66, -1.13.  
467 HRMS (ESI) calculated for [M+H]<sup>+</sup>C<sub>12</sub>H<sub>20</sub>NO<sub>2</sub>Si: 238.1258, found 238.1256.

468

469 **Genetic selection of the mutant synthetase specific for TMSiPhe (TMSiPheRS).**

470

471 The pBK-lib-jw1 library consisting of 2×10<sup>9</sup> independent TyrRS clones was constructed using standard PCR  
472 methods. E. coli DH10B harboring the pREP(2)/YC plasmid was used as the host strain for positive selection. Cells  
473 were transformed with the pBK-lib-jw1 library, recovered in SOC for 1 h, washed twice with glycerol minimal  
474 media with leucine (GMML) before plating on GMML-agar plates supplemented with kanamycin,  
475 chloramphenicol, tetracycline and TMS-Phe at 50 g/ml, 60 g/ml, 15 g/ml and 1mM respectively. Plates were  
476 incubated at 37 °C for 60 hours and surviving cells were harvested. Subsequently, the plasmid DNA was extracted  
477 and purified by gel electrophoresis. The pBK-lib-jw1 DNA was then transformed into electro-competent cells

478 harboring the negative selection plasmid pLWJ17B3, recovered for 1 h in SOC and then plated on LB-agar plates  
479 containing 0.2% arabinose, 50 g/ml ampicillin and 50 g/ml kanamycin. The plates were then incubated at 37 °C  
480 for 8-12 hours, and pBK-lib-jw1 DNA from the surviving clones was extracted as described above. The library  
481 underwent another round of positive selection, followed by a negative selection and a final round of positive  
482 selection (with chloramphenicol at 70 g/mL). At this stage, 96 individual clones were selected and suspended in 50  
483 L of GMMML in a 96-well plate, and then replica-spotted on two sets of GMMML plates. One set of GMMML-agar  
484 plates was supplemented with tetracycline (15 g/mL), kanamycin (50 g/mL) and chloramphenicol at concentrations  
485 of 60, 80, 100 and 120 g/mL with 1 mM TMSiPhe. The other set of plates were identical but did not contain TMSi-  
486 Phe, and the chloramphenicol concentrations used were 0, 20, 40 and 60 g/mL. After 60 h incubation at 37 °C, one  
487 clone was found to survive at 100 g/mL chloramphenicol in the presence of 1 mM TMSiPhe, but only at 20 g/mL  
488 chloramphenicol in the absence TMSiPhe.

489

#### 490 **Purification of TMSiPheRS**

491

492 TMSiPheRS was purified from E.coli as described previously<sup>22</sup>. Briefly, the gene encoding the TMSiPheRS  
493 was cloned into the pET22b vector and then transformed into BL21(DE3) cells. The large scale expression cultures  
494 were grown to an OD of 0.8. After induction for 4-6 hours at 37°C with 1 mM IPTG, cells were pelleted by  
495 centrifugation and re-suspended in lysis buffer (50 mM Tris, pH 8.5, 500 mM NaCl, 10 mM β-mercaptoethanol, 5  
496 mM imidazole). Cells were sonicated and the cell lysate was pelleted by centrifugation. The supernatant was  
497 collected and incubated with Ni-NTA agarose beads for 2 hours at 4°C, filtered, and washed with wash buffer (50  
498 mM Tris, pH 8.5, 500 mM NaCl, 10 mM β-mercaptoethanol, 20 mM imidazole). The synthetase was eluted with a  
499 wash buffer containing 300 mM imidazole in buffer A (25 mM Tris, pH 8.5, 25 mM NaCl, 10 mM β-  
500 mercaptoethanol, 1 mM EDTA), purified by anion exchange chromatography (Hitrap MonoQ ; GE Healthcare)  
501 using a salt gradient from 25 mM to 0.5 M NaCl. TMSiPheRS was purified by Sephadex gel column  
502 chromatography (Superdex 200 10/300 GL; GE Healthcare) in a buffer containing 50 mM Tris, pH 8.5, 500 mM  
503 NaCl, 10 mM β-mercaptoethanol and concentrated to 25 mg/mL.

504

#### 505 **Preparation crystals for TMSiPhe incorporated sfGFP**

506

507 The plasmids encoding sfGFP Y182TMSiPhe in pET22b vector was co-transformed with pEVOL-TMSiPheRS  
508 into BL21(DE3) E.coli cells. Cells were amplified in LB media supplemented with ampicillin (50 µg/mL) and  
509 chloramphenicol (30 µg/mL). Cells were then grown to an OD<sub>600</sub> = 0.8 at 37°C . After induction 14 hours at 30°C  
510 with 0.2% L-arabinose, 0.3 mM IPTG and 0.5 mM TMSiPhe, cells were harvested by centrifugation. The cells  
511 were lysed by French pressing in buffer containing 50 mM HEPES, pH 7.5, 500 mM NaCl. The supernatant was  
512 collected and incubated with Ni-NTA column for 2 hours at 4°C, filtered, and washed with wash buffer containing  
513 50 mM HEPES, pH 7.5, 500 mM NaCl, 20 mM imidazole. The protein was eluted with a wash buffer containing

514 50 mM HEPES, pH 7.5, 500 mM NaCl, 250 mM imidazole. sfGFP Y182TMSiPhe was purified by size exclusion  
515 column (Superdex 200 increase 10/300 GL; GE Healthcare) in a buffer containing 20 mM HEPES-Na, pH 7.5, and  
516 concentrated to 20 mg/mL. The crystal of sfGFP Y182TMSiPhe were obtained at 16°C by the hanging drop vapor  
517 diffusion by mixing 1  $\mu$ L protein sample with equal volume of mother liquor containing 10% PEG 6,000 and 2.0  
518 M Sodium chloride. The crystal appeared within one week. Crystals were then flash-frozen in liquid nitrogen in  
519 10% PEG 6000, 2.0 M Sodium chloride and 20% glycerol.

520

#### 521 **Data collection and Structure determination of TMSiPhe incorporated sfGFP**

522

523 Diffraction data for sfGFP Y182TMSiPhe were collected at beamline BL19U1 of Shanghai Synchrotron Radiation  
524 Facility (SSRF). All data collected were indexed, integrated and scaled using software of XDS and Aimless  
525 respectively<sup>49,50</sup>. The structure of sfGFP Y182TMSiPhe was solved by molecular replacement using sfGFP-66-  
526 HqAla, (PDB code: 4JFG) as a search model by Phaser within PHENIX package. Structural refinement was carried  
527 out by Phenix. In the refinement process, the program Coot in the CCP4 program suite was used for the model  
528 adjustment, and water finding, whereas ligand restraints were produced using the eBLOW contained in PHENIX  
529 software package<sup>51</sup>. The structure models were checked using the PROCHECK<sup>56</sup>.

530

#### 531 **Preparation crystals for TMSiPheRS alone and TMSiPheRS complex**

532

533 Crystals of TMSiPheRS alone were grown at 16°C using the hanging drop vapor diffusion technique against a  
534 mother liquor composed of 22% polyethylene glycol (PEG) 1500, 100 mM Hepes (pH 7.5) and 200 mM L-Proline  
535 and 1:1 mixture of concentrated synthetase (25 mg/mL). For TMSiPheRS complex, TMSiPhe (100  $\mu$ M) was  
536 incubated with TMSiPheRS (10  $\mu$ M) for 2 hours at 25°C. The complex was concentrated to 20 mg/ml, Crystals  
537 were grown in hanging drops containing 1.5  $\mu$ L of complex solution and 1.5  $\mu$ L of a well solution composed of 24%  
538 PEG1500, 100 mM Hepes (pH 7.5) and 200 mM L-Proline. The crystal appeared after about one week. Crystals  
539 were flash frozen in liquid nitrogen after a 30s soak in 26% PEG 1500, 100 mM Hepes (pH 7.5) and 200 mM L-  
540 Proline and 20% glycerol.

541

#### 542 **Data collection and Structure determination of TMSiPheRS alone, TMSiPheRS complex**

543

544 X-ray diffraction data of TMSiPheRS alone and TMSiPheRS complex were collected at beamline BL19U1 of  
545 Shanghai Synchrotron Radiation Facility (SSRF). All data collected were indexed, integrated and scaled using  
546 software of XDS and Aimless respectively<sup>49,50</sup>. The structure of TMSiPheRS alone and TMSiPheRS complex was  
547 solved by molecular replacement using F2Y–F2YRS complex (PDB code: 4HJX) as a search model by Phaser  
548 within PHENIX package. Structural refinement was carried out by Phenix. In the refinement process, the program  
549 Coot in the CCP4 program suite was used for the model adjustment, and water finding, whereas ligand restraints  
550 were produced using the eBLOW contained in PHENIX software package<sup>51</sup>. The structure models were checked

551 using the PROCHECK<sup>56</sup>.

552

### 553 **Peptide synthesis**

554

555 A fully phosphorylated 29-amino-acid carboxy-terminal peptide derived from the human V2 vasopressin receptor  
556 (V2Rpp: 343ARGRpTPPpSLGPQDEpSCpTpTApSpSpSLAKDTSS371) was synthesized from Tufts University  
557 Core Facility. And the high-affinity version of Gt $\alpha$ (340ILENLKDCGLF350, Gt $\alpha$ CT-HA) were purchased from  
558 China Peptides Co., Ltd. with more than 95% purity as verified by analytical high-performance liquid  
559 chromatography. In the competition assays, the Gt $\alpha$ CT and the V2Rpp were used as 200  $\mu$ M concentration.

560

### 561 **Expression and purification of $\beta$ -arrestin-1 TMSiPhe mutants.**

562

563 The pEVOL-TMSiPheRS plasmids encoding specific *M. jannaschii* tyrosyl amber suppressor tRNA/tyrosyl-tRNA  
564 synthase mutants were co-transformed into *E. coli* BL21 (DE3) together with the pET22b vector harboring the  
565 target  $\beta$ -arrestin-1 mutant. The *E. coli* cells were cultured in Luria-Bertani (LB) medium. After the 1L cell culture  
566 reached OD<sub>600</sub> 0.6-0.8, the cells were induced with 300  $\mu$ M isopropyl- $\beta$ -D-thiogalactopyranoside (IPTG) and 0.2%  
567 L-arabinose for 12 h (25°C) to allow protein expression in presence of 0.5mM TMSiPhe in the culture medium.  
568 The cells were lysed by French pressing in buffer A (50 mM Tris-HCl, pH 8.0, 150 mM NaCl) and the lysate was  
569 batch binding with 300  $\mu$ L Ni-NTA column (GE Healthcare, USA). After an extensive washing with buffer A, the  
570 target protein was eluted using 300mM imidazole in buffer A. These proteins were subsequently purified by size  
571 exclusion column Superdex 75 and the buffer was exchanged to buffer B (50 mM Tris-HCl, pH 7.5, 150 mM NaCl).

572

### 573 **Expression and purification of $\beta$ 2V2R**

574

575 FLAG- $\beta$ 2V2R and GRK2-CAAX were co-expressed in baculovirus-infected insect cells (Sf9) using the Bac-to-  
576 Bac baculovirus Expression System as previously described<sup>38</sup>. Cells were stimulated with ISO (10  $\mu$ M) and  
577 harvested at 64 or 72 h after infection. The cell pellets were stored at -80°C. Cell membranes were disrupted by  
578 thawing frozen cell pellets in 300 ml of hypotonic buffer C (10 mM HEPES pH7.5, 20 mM KCl and protease  
579 inhibitor cocktail) and homogenized using a Dounce homogenizer repeated plunging. The membrane fraction was  
580 separated from the lysate via ultracentrifugation (42,000 rpm speed for 40 min in Ti45 rotor). The pellet was washed  
581 3-4 times with a high osmotic buffer D containing 1.0 M NaCl in the above buffer C, and centrifuge as above. The  
582 pellet was subsequently solubilized with 1% n-decyl- $\beta$ -D-maltopyranoside and (DDM, Anatrace) 0.2%CHS (sigma)  
583 in buffer E (50 mM HEPES pH7.5, 1 M NaCl). The solubilized membrane fraction was then purified by flag-M1  
584 resin (sigma) affinity chromatography in buffer F (20 mM HEPES pH7.5, 150 mM NaCl, 0.1%DDM, 0.02% CHS).  
585 Finally, the sample buffer was exchanged to buffer G (20 mM HEPES pH7.5, 150 mM NaCl, 0.01%LMNG, 0.002%  
586 CHS) using a PD-10 desalting column. Purified protein samples were used fresh in the experiments.

587



## 588 **Superdex Exclusion Chromatography**

589

590 The purified pp $\beta$ 2V2R (30  $\mu$ M) were stimulated with different ligands (60  $\mu$ M) and then incubated with  $\beta$ -arrestin-  
591 1 H295TMSiPhe (10  $\mu$ M) for 30 min at 25°C. Then Fab30 (20  $\mu$ M) was then added to the mixture and the complex  
592 was allowed to form for 1h at 25 °C. The ligand/pp $\beta$ 2V2R/ $\beta$ -arrestin-1 H295TMSiPhe-Fab30 complex were  
593 concentrated and then purified by Superdex 200 increase in 20 mM HEPES pH7.5, 150 mM NaCl, 0.01% LMNG,  
594 0.002% CHS and corresponding ligand (60  $\mu$ M). The yield of the purified complexes were approximately 50%,  
595 and the purities were judged by size exclusion chromatography and the electrophoresis.

596

## 597 **NMR experiment**

598

599  $\beta$ -arrestin-1 TMSiPhe mutants prepared for NMR analysis were quantified with BCA protein assay kit and diluted  
600 with buffer B (containing 10% D2O) to 5~20  $\mu$ M. All 1D 1H NMR spectra were recorded with typical total  
601 experimental times 8~15 min at 25°C, on an Avance 950 MHz spectrometer with cytoprobe (Bruker, Billerica,  
602 MA). The spectra were processed and analyzed with the program ZGGPW5 (NS = 32; DS = 4; SW = 20ppm;  
603 AQ = 1.93 s; D1 = 1s. The number of scans was adjusted to the relative protein concentration in each experiment.  
604 The chemical shift of the signal peak was determined by reference to D2O (4.68ppm).

605 Binding of the V2Rpp to the  $\beta$ -arrestin1 was assessed using  $\beta$ -arrestin1-F388TMSiPhe (20  $\mu$ M), in the presence of  
606 V2Rpp at a gradient increased concentration, in 50 mM Tris-HCl, pH 7.5, 150 mM NaCl, 10% D2O buffer on a  
607 Bruker 950 MHz NMR spectrometer. The signal was normalized with Tris and integrated at shift -0.05 ppm after  
608 auto baseline correction by MestReNova.9. Through calculating the ratio of the area of remaining Apo NMR peak  
609 and the original concentration of each component, the complex state (Bound) concentration and free ligand (V2Rpp)  
610 concentration were obtained for Scatchard plotting and one-site specific curve fitting.

611 Buffer for complex of pp $\beta$ 2V2R/ $\beta$ -arrestin1/Fab30 1D1H NMR spectra was 20 mM HEPES, 150 mM NaCl, 0.01%  
612 LMNG, 0.002% CHS, 10% D2O, pH 7.5, 60  $\mu$ M ligand or control vehicle (diluted DMSO). The total recording  
613 time for each experiment was 40 min. spectra were recorded using a Bruker 950 MHz NMR spectrometer at 25°C.

614

## 615 **Expression and purification of Fab 30 proteins**

616

617 The purification of Fab30 was performed as previously described<sup>36</sup>. M5532 E. Coli competent cells was  
618 transformed with the plasmid containing Fab30 fragment and was cultured in the CRAP-Amp medium cultures in  
619 2.8 L non-baffled flasks and grow for 18-24 hours at 30°C (200 rpm). These cells were pelleted and freeze with  
620 liquid nitrogen, then stored at -80°C. The frozen cell pellets were thawed at room temperature and added with 15  
621 mL of TES (Tris-EDTA-Sucrose) / pellet of 1 liter culture; resuspend, shaken for one hour on ice in cold room  
622 platform shaker with 150 rpm (TES buffer: 200mM Tris pH=8.0; 0.5 mM EDTA, 0.5 M sucrose), followed by  
623 adding with 30 ml of TES/4 (TES one part plus 3 parts ice cold deionized H2O) per pellet of 1 liter culture and

624 continue to shake 1h on ice. The solution was poured into 250 mL centrifuge bottles and spin in SLA 1500 rotor  
625 for 30 minutes at 15000 rpm. All remaining purification steps were carried out in cold room. The supernatant of  
626 the cell lysate were incubated with Ni-NTA beads by 2-12 hours with a ratio of 500  $\mu$ L beads/ 1 liter culture. The  
627 beads were packed in a column and washed with 40 CV of cold buffer B (20 mM Tris-Hcl pH=7.55, 150 mM  
628 NaCl), and then eluted with buffer C (20 mM Tris-HCl pH=7.55, 150 mM NaCl, 250 mM imidazole).

629

### 630 **GST pull down assay**

631

632 0.1  $\mu$ M wild-type or mutant  $\beta$ -arrestin-1 was mixed with 0.5 $\mu$ M phospho-receptor-C-tail fragment (V2Rpp) and  
633 incubated in binding buffer (20 mM Tris-HCl, pH 7.5, 150 mM NaCl, 2 mM EDTA, 1 mM DTT) at 25°C for 30  
634 min as previously described<sup>12</sup>. 1  $\mu$ M GST-clathrin was then added and incubated for another hour. Subsequently,  
635 10  $\mu$ L GST beads were added into the mixture and the mixture was rolled at 4°C for 2 h. The GST beads were  
636 collected by centrifuge and washed with wash buffer (binding buffer with 0.5% Tween20) for 4 times. After  
637 removing the supernatant, the samples were re-suspended in 50  $\mu$ L 2 $\times$ SDS loading buffer and boiled for 10 min  
638 before western blot.

639

### 640 **Bimane labeling of purified receptors and TRIQ experiment**

641

642 The method was carried out according to a previously published manuscript<sup>52</sup>. Purified receptors ( $\beta$ 2AR- $\Delta$ 5-  
643 Cys271+Trp135 ) and mBBR (Invitrogen) were mixed at the same molarity in LMNG buffer (not containing CHS)  
644 and incubated overnight on ice in the dark. Fluorophore-labeled receptors were obtained by gel filtration on a  
645 desalting column equilibrated with LMNG/CHS buffer (20 mM HEPES, 150 mM NaCl, 0.01% LMNG, 0.002%  
646 CHS, pH 7.5).

647 Fluorescence spectroscopy was measured on a Varioskan flash (Thermo Scientific) instrument with full wavelength  
648 scanning mode at 25°C. 100  $\mu$ L samples containing 0.2  $\mu$ M bimane labeled  $\beta$ 2AR in a MicroFluor 96-well plate  
649 were excited at 390 nm, and the emission fluorescence was measured by scanning from 430 to 500 nm using a 2 nm  
650 step . Each data point was integrated for 0.2 s. If the ligand was present, concentration of ligand was set for 5 $\mu$ M  
651 and the incubation time was set for 15min. We corrected fluorescence intensity for background fluorescence from  
652 buffer. Spectra were analyzed using the GraphPad Prism 5.

653

### 654 **BRET assay**

655

656 HEK293 cells seeded in 6-well plates were transfected with 0.5  $\mu$ g BRET donor Flag- $\beta$ 2V2R-Rluc and 1  $\mu$ g BRET  
657 acceptor Lyn-YFP using polyethylenimine as previously described<sup>21</sup>. 24 h after transfection, the cells were detached  
658 and distributed into 96-well plates at a density of  $\sim$ 25,000 cells per well. After another 24 h incubation at 37 °C,  
659 the cells were washed twice with Tyrode's buffer (140 mM NaCl, 2.7 mM KCl, 1 mM CaCl<sub>2</sub>, 12 mM NaHCO<sub>3</sub>,

660 5.6 mM D-glucose, 0.5 mM MgCl<sub>2</sub>, 0.37 mM NaH<sub>2</sub>PO<sub>4</sub> and 25 mM HEPES, pH 7.4) and stimulated with vehicle  
661 or different ligands (final concentration of 10  $\mu$ M) at 37 °C for 20 min. Luciferase substrate coelenterazine-h was  
662 added at a final concentration of 5  $\mu$ M before light emissions were recorded using a Mithras LB940 microplate  
663 reader (Berthold Technologies) equipped with BRET filter sets. The BRET signal was determined by calculating  
664 the ratio of the light intensity emitted by YFP (530/20 nM) over the light intensity emitted by Rluc (485/20 nM).  
665

### 666 **Intra-gel digestion and LC-MS/MS analysis and database search**

667  
668 The TMSiPhe incorporated  $\beta$ -arrestin1 was purified and subjected to the electrophoresis. After decolorized, DTT  
669 reduction and alkylated by iodoacetamide, the dyeing strip was digested by trypsin overnight. The peptides were  
670 extracted with 60% acetonitrile. The peptide mixture obtained after enzymatic hydrolysis was analyzed by a liquid  
671 chromatography-linear ion trap-orbitrap (nanoLC-LTQ-Orbitrap XL, Thermo, San Jose, CA) mass spectrometer.  
672 The chromatographic column was a C18 reverse phase column. Mobile phase A: 0.1% FA/H<sub>2</sub>O, B: 0.1%  
673 FA/80%CAN/20% H<sub>2</sub>O, flow rate 300 nL/min. A gradient of 90 min was used. Data analysis was performed using  
674 Proteome Discoverer (version 1.4.0.288, Thermo Fischer Scientific) software. The MS2 spectrum uses the  
675 SEQUEST search engine to search for arrestin H295TMSiPhe containing fasta. The search parameters are: Trypsin  
676 enzymatic hydrolysis, half cut, two missed cut sites, precursor ion mass error less than 20 ppm, and fragment ion  
677 mass error less than 0.6 Da. The alkylation of cysteine was set as a fixed modification, and the oxidation of  
678 methionine and the specific modification of histidine (H+82.049 Da) were variable modifications. The retrieved  
679 peptides and spectral matches (PSM) were filtered using the Percolator algorithm with a q value of less than 1%  
680 (1% FDR). The retrieved peptides are combined into a protein under strict maximum parsimony principles.  
681

### 682 **Q-TOF mass spectrometry spectrum analysis and database search.**

683  
684 LC-MS analysis was performed using a Agilent Q-TOF mass spectrometer in line with a Agilent 1290 HPLC  
685 system. The 5  $\mu$ l purified TMSiPhe incorporated  $\beta$ -arrestin1 protein was loaded onto a reverse phase column (30  
686 0SB-C8, 2.1 x 50 mm, 3.5  $\mu$ M particle) (Agilent Technologies, SantaClara, CA). The proteins were then eluted  
687 over a gradient: 2% B for 2min to waste, then turned LC to MS , 2–50% B in 6 min, 50–90% B in 4 min, 90% B  
688 sustained for 4min, then decreased to 2% in 1.1 min, (where B is 100% Acetonitrile, 0.1% formic acid, A is water  
689 with 0.1% formic acid) at a flow rate of 0.2 mL/min.and the elution was introduced online into the Q-TOF mass  
690 spectrometer (Agilent Technologies, SantaClara, CA) using electrospray ionization. MS data were analysed by  
691 MassHunter biocomfirm software.  
692

### 693 **Statistical Analysis**

694  
695 For all experiment, the number of replicates and P value cutoff are described in the respective figure legends. Error  
696 bars are shown for all data points with replicates as a measure of variation with the group. Statistical differences

697 were determined by One-way ANOVA using the analysis software GraphPad Prism (\*P<0.05; \*\*P<0.01;  
698 \*\*\*P<0.005)

699

700

701

## 702 **References**

703

704 1 Weis, W. I. & Kobilka, B. K. The Molecular Basis of G Protein-Coupled Receptor Activation. *Annu Rev*  
705 *Biochem* **87**, 897-919, (2018).

706 2 Yan, N. Structural Biology of the Major Facilitator Superfamily Transporters. *Annu Rev Biophys* **44**, 257-  
707 283, (2015).

708 3 Zhou, X. E. *et al.* Identification of Phosphorylation Codes for Arrestin Recruitment by G Protein-Coupled  
709 Receptors. *Cell* **170**, 457-469 e413, (2017).

710 4 Gregorio, G. G. *et al.* Single-molecule analysis of ligand efficacy in beta2AR-G-protein activation. *Nature*  
711 **547**, 68-73, (2017).

712 5 Kaplan, M., Pinto, C., Houben, K. & Baldus, M. Nuclear magnetic resonance (NMR) applied to membrane-  
713 protein complexes. *Q Rev Biophys* **49**, e15, (2016).

714 6 Sim, D. W. *et al.* Application of Solution NMR to Structural Studies on alpha-Helical Integral Membrane  
715 Proteins. *Molecules* **22**, (2017).

716 7 Kerfah, R., Plevin, M. J., Sounier, R., Gans, P. & Boisbouvier, J. Methyl-specific isotopic labeling: a  
717 molecular tool box for solution NMR studies of large proteins. *Curr Opin Struct Biol* **32**, 113-122, (2015).

718 8 Liu, J. J., Horst, R., Katritch, V., Stevens, R. C. & Wuthrich, K. Biased signaling pathways in beta2-  
719 adrenergic receptor characterized by 19F-NMR. *Science* **335**, 1106-1110, (2012).

720 9 Manglik, A. *et al.* Structural Insights into the Dynamic Process of beta2-Adrenergic Receptor Signaling.  
721 *Cell* **161**, 1101-1111, (2015).

722 10 Ye, L. *et al.* Mechanistic insights into allosteric regulation of the A2A adenosine G protein-coupled receptor  
723 by physiological cations. *Nat Commun* **9**, 1372, (2018).

724 11 Hu, W., Wang, H., Hou, Y., Hao, Y. & Liu, D. Trimethylsilyl reporter groups for NMR studies of  
725 conformational changes in G protein-coupled receptors. *FEBS Lett* **593**, 1113-1121, (2019).

726 12 Yang, F. *et al.* Allosteric mechanisms underlie GPCR signaling to SH3-domain proteins through arrestin.  
727 *Nat Chem Biol* **14**, 876-886, (2018).

728 13 Loh, C. T., Adams, L. A., Graham, B. & Otting, G. Genetically encoded amino acids with tert-butyl and  
729 trimethylsilyl groups for site-selective studies of proteins by NMR spectroscopy. *J Biomol NMR* **71**, 287-  
730 293, (2018).

731 14 Smith, J. S., Lefkowitz, R. J. & Rajagopal, S. Biased signalling: from simple switches to allosteric  
732 microprocessors. *Nat Rev Drug Discov* **17**, 243-260, (2018).

733 15 Sente, A. *et al.* Molecular mechanism of modulating arrestin conformation by GPCR phosphorylation. *Nat*

- 734 *Struct Mol Biol* **25**, 538-545, (2018).
- 735 16 Yang, F. *et al.* Phospho-selective mechanisms of arrestin conformations and functions revealed by  
736 unnatural amino acid incorporation and (19)F-NMR. *Nat Commun* **6**, 8202, (2015).
- 737 17 Latorraca, N. R. *et al.* Molecular mechanism of GPCR-mediated arrestin activation. *Nature* **557**, 452-456,  
738 (2018).
- 739 18 Eichel, K. *et al.* Catalytic activation of beta-arrestin by GPCRs. *Nature* **557**, 381-386, (2018).
- 740 19 Wang, H. M. *et al.* A stress response pathway in mice upregulates somatostatin level and transcription in  
741 pancreatic delta cells through Gs and beta-arrestin 1. *Diabetologia* **57**, 1899-1910, (2014).
- 742 20 Ning, S. L. *et al.* Different downstream signalling of CCK1 receptors regulates distinct functions of CCK  
743 in pancreatic beta cells. *Br J Pharmacol* **172**, 5050-5067, (2015).
- 744 21 Liu, C. H. *et al.* Arrestin-biased AT1R agonism induces acute catecholamine secretion through TRPC3  
745 coupling. *Nat Commun* **8**, 14335, (2017).
- 746 22 Li, F. *et al.* A genetically encoded 19F NMR probe for tyrosine phosphorylation. *Angew Chem Int Ed Engl*  
747 **52**, 3958-3962, (2013).
- 748 23 Chin, J. W. Expanding and reprogramming the genetic code. *Nature* **550**, 53-60, (2017).
- 749 24 Reinkemeier, C. D., Girona, G. E. & Lemke, E. A. Designer membraneless organelles enable codon  
750 reassignment of selected mRNAs in eukaryotes. *Science* **363**, (2019).
- 751 25 Wang, L. Engineering the Genetic Code in Cells and Animals: Biological Considerations and Impacts. *Acc*  
752 *Chem Res* **50**, 2767-2775, (2017).
- 753 26 Frankel, M., Gertner, D., Shenhar, A. & Zilkha, A. J. J. o. t. C. S. 971. Synthesis of DL-p-  
754 trimethylsilylphenylalanine. 5049-5051 (1963).
- 755 27 Wang, L., Brock, A., Herberich, B. & Schultz, P. G. Expanding the genetic code of Escherichia coli. *Science*  
756 **292**, 498-500, (2001).
- 757 28 Xie, J. & Schultz, P. G. An expanding genetic code. *Methods* **36**, 227-238, (2005).
- 758 29 Wang, J. *et al.* A biosynthetic route to photoclick chemistry on proteins. *J Am Chem Soc* **132**, 14812-14818,  
759 (2010).
- 760 30 Peterson, Y. K. & Luttrell, L. M. The Diverse Roles of Arrestin Scaffolds in G Protein-Coupled Receptor  
761 Signaling. *Pharmacol Rev* **69**, 256-297, (2017).
- 762 31 Chen, W. N. *et al.* O-tert-Butyltyrosine, an NMR tag for high-molecular-weight systems and measurements  
763 of submicromolar ligand binding affinities. *J Am Chem Soc* **137**, 4581-4586, (2015).
- 764 32 Cahill, T. J., 3rd *et al.* Distinct conformations of GPCR-beta-arrestin complexes mediate desensitization,  
765 signaling, and endocytosis. *Proc Natl Acad Sci U S A* **114**, 2562-2567, (2017).
- 766 33 Rahmeh, R. *et al.* Structural insights into biased G protein-coupled receptor signaling revealed by  
767 fluorescence spectroscopy. *Proc Natl Acad Sci U S A* **109**, 6733-6738, (2012).
- 768 34 Yang, Z. *et al.* Phosphorylation of G Protein-Coupled Receptors: From the Barcode Hypothesis to the Flute  
769 Model. *Mol Pharmacol* **92**, 201-210, (2017).
- 770 35 Shukla, A. K. *et al.* Visualization of arrestin recruitment by a G-protein-coupled receptor. *Nature* **512**, 218-

- 771 222, (2014).
- 772 36 Shukla, A. K. *et al.* Structure of active beta-arrestin-1 bound to a G-protein-coupled receptor  
773 phosphopeptide. *Nature* **497**, 137-141, (2013).
- 774 37 Kang, Y. *et al.* Crystal structure of rhodopsin bound to arrestin by femtosecond X-ray laser. *Nature* **523**,  
775 561-567, (2015).
- 776 38 Kumari, P. *et al.* Functional competence of a partially engaged GPCR-beta-arrestin complex. *Nat Commun*  
777 **7**, 13416, (2016).
- 778 39 Liang, Y. L. *et al.* Phase-plate cryo-EM structure of a class B GPCR-G-protein complex. *Nature* **546**, 118-  
779 123, (2017).
- 780 40 Draper-Joyce, C. J. *et al.* Structure of the adenosine-bound human adenosine A1 receptor-Gi complex.  
781 *Nature* **558**, 559-563, (2018).
- 782 41 Koehl, A. *et al.* Structure of the micro-opioid receptor-Gi protein complex. *Nature* **558**, 547-552, (2018).
- 783 42 Xu, T. R. *et al.* Mutations of beta-arrestin 2 that limit self-association also interfere with interactions with  
784 the beta2-adrenoceptor and the ERK1/2 MAPKs: implications for beta2-adrenoceptor signalling via the  
785 ERK1/2 MAPKs. *Biochem J* **413**, 51-60, (2008).
- 786 43 Didenko, T., Liu, J. J., Horst, R., Stevens, R. C. & Wuthrich, K. Fluorine-19 NMR of integral membrane  
787 proteins illustrated with studies of GPCRs. *Curr Opin Struct Biol* **23**, 740-747, (2013).
- 788 44 Ye, L., Van Eps, N., Zimmer, M., Ernst, O. P. & Prosser, R. S. Activation of the A2A adenosine G-protein-  
789 coupled receptor by conformational selection. *Nature* **533**, 265-268, (2016).
- 790 45 Brem, J. *et al.* Rhodanine hydrolysis leads to potent thioenolate mediated metallo-beta-lactamase inhibition.  
791 *Nat Chem* **6**, 1084-1090, (2014).
- 792 46 Gurevich, V. V. & Benovic, J. L. Visual arrestin interaction with rhodopsin. Sequential multisite binding  
793 ensures strict selectivity toward light-activated phosphorylated rhodopsin. *J Biol Chem* **268**, 11628-11638  
794 (1993).
- 795 47 Kan, S. B., Lewis, R. D., Chen, K. & Arnold, F. H. Directed evolution of cytochrome c for carbon-silicon  
796 bond formation: Bringing silicon to life. *Science* **354**, 1048-1051, (2016).
- 797 48 Wang, H. M. *et al.* The catalytic region and PEST domain of PTPN18 distinctly regulate the HER2  
798 phosphorylation and ubiquitination barcodes. *Cell Res* **24**, 1067-1090, (2014).
- 799 49 Kabsch, W. J. A. C. S. D. B. C. Xds. **66**, 125-132 (2010).
- 800 50 Evans PR & Murshudov. How good are my data and what is the resolution? *J Acta Crystallographica*  
801 *Section D: Biological Crystallography* **69** (7):1204-1214, (2013)
- 802 51 Adams, P. D. *et al.* PHENIX: a comprehensive Python-based system for macromolecular structure solution.  
803 *Acta Crystallogr D Biol Crystallogr* **66**, 213-221, (2010).
- 804 52 Yao, X. *et al.* Coupling ligand structure to specific conformational switches in the beta2-adrenoceptor. *Nat*  
805 *Chem Biol* **2**, 417-422, (2006).
- 806 53 Kenkichi, N.計測と制御 額 J.核磁気共鳴-とくに分析化学への応用. *Journal of the Society of &*  
807 *Instrument & Control Engineers* 1(2):89-94. (1962)

- 808 54 Arnold, M. R., Kremer, W., Ludemann, H. D. & Kalbitzer, H. R. <sup>1</sup>H-NMR parameters of common amino  
809 acid residues measured in aqueous solutions of the linear tetrapeptides Gly-Gly-X-Ala at pressures between  
810 0.1 and 200 MPa. *Biophys Chem* **96**, 129-140 (2002).
- 811 55 Szczepek, M. *et al.* Crystal structure of a common GPCR-binding interface for G protein and arrestin. *Nat*  
812 *Commun* **5**, 4801, (2014).
- 813 56 Laskowski, R. A., MacArthur, M. W., Moss, D. S. & Thornton, J. M. PROCHECK: a program to check the  
814 stereochemical quality of protein structures. *Journal of Applied Crystallography* **26(2)**, 283-291 (1993)
- 815

## 816 Acknowledgements

817

818 NMR experiments were performed at the performed at the Beijing NMR Center and the NMR facility of  
819 National Center for Protein Sciences at Peking University, and Nuclear Magnetic Resonance Science Research  
820 Platform at Wuhan Institute of Physics and Mathematics, Chinese Academy of Sciences (CAS). We thank the staff  
821 of BL19U1 beamlines at National Center for Protein Sciences Shanghai and Shanghai Synchrotron Radiation  
822 Facility for assistance during data collection. We thank Prof. Mai-li Liu and Prof. Xu zhang from Wuhan Institute  
823 of Physics and Mathematics, CAS, Hong-wei Li from Beijing nuclear magnetic resonance center, Ms Shan-shan  
824 Zang and Dr Xue-hui Liu from the Core Facility of Protein Research, Institute of Biophysics (IBP), CAS, for their  
825 help in the NMR data collection, analysis and valuable discussion. We thank Jun-ying Jia and Shuang Sun from  
826 Lab of Structural and Functional Analysis (IBP, CAS) for their technical assistance in flow cytometry analysis, and  
827 their colleague Jian-Hui Li for assistance in fluorescence measurement. We thank Xiang Ding and Zhen-sheng Xie  
828 from Lab of Proteomics (IBP, CAS) for LC-MS analysis.

829 We acknowledge support from the National Key Basic Research Program of China (2018YFC1003600 to J.-  
830 P.S; 2017YFA0505400, 2016YFA0501502 to J.Y.W. and F. H. L.), the National Natural Science Foundation of  
831 China (81773704 and 31611540337 to J.-P.S., 21837005, 21750003 to J.Y.W., U1532150 and 91640106 to F. H.  
832 L., 31700692 to P.X.), The National Science Fund for Distinguished Young Scholars (81825022 to J.-P.S.) and the  
833 Program for Changjiang Scholars and Innovative Research Team in University (IRT13028).

834

## 835 Author Contributions

836

837 J.-P.S. conceives the idea for extracellular ligands induced conformational changes in  $\beta$ -arrestin-1 via direct  
838 receptor 7-transmembrane core interactions. J.Y.W. conceived the idea that TMSiPhe should be an excellent nuclear  
839 magnetic probe, and designed evolutionary strategy for TMSiPheRS. J.-P.S., J.Y.W. and X.Y. designed most of the  
840 experiments. Q.L., F.Y., P.S., Q.-W.W. and F. Z. collected and analyzed the <sup>1</sup>H NMR data. X.-X.L. and F.-H.L.  
841 realized insertion and verification of unnatural amino acids. Z.-L. Z. and Q.-T.H. Performed crystallization and  
842 structure solution and analysis of the synthetase and TMSiPhe decorated GFP. Q.L., X.-Y.W., F.Y., P. X., S.-M.H.,  
843 S.-C.G. and M.-J.H. expressed and purified GPCR proteins. Q.-T.H. carried out Superdex Exclusion  
844 Chromatography . Q.-T. H.and C.-X.Q. supplied critical antibody Fab 30. Q.L., Z. X., and S.-L.S. Synthesized

845 TMSiPhe. Prof. X.C. synthesized the compound BI-167107. Z. Y. performed BRET assay. Z.-Y.Y. performed GST  
846 pulldown assay. Q.L. performed fluorescence spectroscopy assay. Q.L., Z. G. and J.-Y. L. performed FSEC analysis  
847 for GPCR-arrestin complex (Data not shown). A.W. K., K.-H.X. and J.-P.S. decorated the GFP on the arrestin  
848 and developed the FSEC methods. K. R., X.-G.N. and C.-W. J. participated in the design and explanation of the  
849 NMR results. W. K., X.Y. supervised the fluorescence and BRET experiments.  
850 J.-P.S., J.Y.W. and X.Y. supervised the overall project design and execution. J.-P.S. participated in data analysis and  
851 interpretation. Professor K.K.Z. and K.R. offered important advice and help especially in NMR experiment. J.-P.S.  
852 and J.Y. W wrote the manuscript. All of the authors have seen and commented on the manuscript.

853

854 **Competing interests:** The authors declare no competing interests.

855

856

857

858



859

860 **Figure. 1. Development of TMSiPheRS by genetic code expansion and the selectivity of**  
861 **TMSiPheRS**

862 (a) The ranges of the methyl  $^1\text{H}$  chemical shifts<sup>53</sup>(shown by bidirectional arrows) and the  
863 distribution of random-coil aliphatic CH  $^1\text{H}$  chemical shifts for the 20 genetically coded  
864 amino acids<sup>54</sup>. The  $^1\text{H}$  chemical shifts of methyl silicon group are specified in red.

865 (b) Coomassie-stained gel analysis of full-length  $\beta$ -arrestin-1 expression in *E. coli* cells that  
866 were cotransfected with the  $\beta$ -arrestin-1-H295TAG plasmid and the pEVOL-TMSiPheRS  
867 plasmid, encoding a specific *M. jannaschii* tyrosyl amber suppressor tRNA/tyrosyl-tRNA  
868 synthetase mutant grown in the presence or absence of different silicon-containing  
869 compounds. WT indicates wild-type arrestin without any change in genetic code. Full-  
870 length  $\beta$ -arrestin-1 protein was obtained only in the presence of TMSiPhe for TAG mutation  
871 of  $\beta$ -arrestin-1 or WT. These results suggested that the evolved TMSiPheRS exhibited  
872 significant structural selectivity for TMSiPhe over other silicon-containing chemicals. The  
873 chemical abbreviations are as follows:

- 874 (1) 4-(trimethylsilyl) phenylalanine, TMSiPhe;  
875 (2) 3,5-dichloro-4-[(trimethylsilyl) methoxy]phenylalanine, TMSiM-dcTy;  
876 (3) 2-amino-3-((trimethylsilyl)methylthio)propanoic acid, TMSiM-Cys;  
877 (4) 2-amino-4-((trimethylsilyl)methylthio)butanoic acid, TMSiM-hCys;  
878 (5) 4-[(trimethylsilyl)ethoxy]phenylalanine, TMSiM-Tyr;  
879 (6) control, Ctl. There were no unnatural amino acids added to the culture.

880 (c) Schematic flowchart for the incorporation of TMSiPhe into  $\beta$ -arrestin-1 at the H295 site.  
881 Full-length  $\beta$ -arrestin-1 protein was obtained by cotransfection with the  $\beta$ -arrestin-1 H295  
882 TAG mutant plasmid and the pEVOL-TMSiPheRS plasmid, with TMSiPhe  
883 supplementation of the culture medium. The purity of the protein was determined by  
884 electrophoresis. The protein was subjected to trypsin digestion and analyzed by MS/MS.  
885 These results unambiguously confirmed that TMSiPhe was selectively incorporated into  $\beta$ -  
886 arrestin-1 at the H295 position. m/z, mass/charge ratio.

887 (d) The 2Fo-Fc annealing omit map of sfGFP-Y182-TMSiPhe clearly shows the electron  
888 density of TMSiPhe. The map was contoured at 1.1  $\sigma$ .

889 (e) 1D  $^1\text{H}$  NMR spectra for the  $\beta$ -arrestin-1 H295 TMSiPhe mutant were compared with those  
890 for wild-type  $\beta$ -arrestin-1 cultured in the presence of TMSiPhe. The spectra were recorded in a  
891 buffer containing 50 mM Tris-HCl (pH 7.5) and 150 mM NaCl at 25°C using a Bruker 950  
892 MHz NMR spectrometer. The  $\beta$ -arrestin-1 H295 TMSiPhe chemical shift at 0.26 ppm was  
893 consistent with the predicted chemical shift of the TMSi group. The  $^1\text{H}$  NMR signals of TMS

894 group substituted amino acids in a protein were generally located in the high-field region (<0.55  
895 ppm, blue area).

896

897

898 **Figure. 2. Structural basis for the selective recognition of TMSiPhe by TMSiPheRS**

899 (a) Binding of TMSiPhe at the active site of TMSiPheRS. The 2Fo-Fc annealing omit electron  
900 density map of TMSiPhe was contoured at 1.0  $\sigma$ .

901 (b) Comparison of the unnatural amino acid-binding pockets between TMSiPheRS (red dotted  
902 line) and the wild-type *Mj*-TyrRS (black dotted line, PDB:1J1U). Five key mutations, indicated  
903 by arrows, increased the size of the TMSiPhe-binding pocket substantially.

904 (c) Interactions between TMSiPhe and TMSiPheRS. The specific interactions include hydrogen  
905 bonds (blue dotted line),  $\pi$ -cation interactions (red dotted line), ion-dipole interactions (magenta  
906 dotted line) and hydrophobic interactions with surrounding residues (left panel).

907 (d) The H32 residue in the  $\beta$ 2 strand was rotated approximately 120 degrees in the  
908 TMSiPhe/TMSiPheRS complex (green) compared with TMSiPheRS alone (magenta), leading  
909 to favorable charged interactions with TMSiPhe.

910

911

912 **Figure. 3. Incorporation of TMSiPhe at different functionally relevant motifs of  $\beta$ -**  
913 **arrestin-1 and characterization of  $\beta$ -arrestin-1 activation by TMSiPheRS.**

914 (a) Frontal view of the TMSiPhe incorporation sites depicted by spheres in the inactive  $\beta$ -  
915 arrestin-1 crystal structure (PDB: 1G4M). Orange, Y21 in the three elements; purple, Y63 in  
916 the finger loop; blue, Y173 in the hinge region; cyan, Y249 in  $\beta$ -strand XVI; pink, R285, green,  
917 H295 in the lariat loop; red, F388 in the C-terminal swapping segment.

918 (b) 1D  $^1\text{H}$  NMR spectra of  $\beta$ -arrestin-1 labeled as described in (3a). The spectra were recorded  
919 in a buffer containing 50 mM Tris-HCl (pH 7.5 and 150 mM NaCl at 25°C using a Bruker 950  
920 MHz NMR spectrometer. The protein concentrations were 5~15  $\mu\text{M}$ , and the total recording  
921 time per spectrum was 6~15 min. The chemical shift for the TMSiPhe protein was less than  
922 0.55 ppm.

923 (c) Cartoon illustration of the activation of  $\beta$ -arrestin-1 and movement of the C-terminal  
924 swapping segment of  $\beta$ -arrestin-1. In response to the binding of an activator, such as the  
925 phospho-vasopressin receptor C-tail (V2Rpp), the originally embedded C-terminal swapping  
926 segment of  $\beta$ -arrestin-1 became highly solvent exposed, thus favoring binding to downstream  
927 signaling proteins, for example, clathrin or AP2 (adaptor protein 2). This conformational  
928 transition could be monitored by incorporation of TMSiPhe at the F388 position of  $\beta$ -arrestin-  
929 1, which is located in the C-terminal swapping segment.

930 (d) 1D <sup>1</sup>H-NMR spectra of β-arrestin-1–F388-TMSiPhe in response to titration with V2Rpp.  
931 Two distinct peaks were observed. The peak (-0.05 ppm) representing the inactive state  
932 gradually decreased in intensity, while the peak representing the active state (0.15 ppm) steadily  
933 increased in intensity. The spectra were recorded in a buffer containing 50 mM Tris-HCl (pH  
934 7.5) and 150 mM NaCl at 25°C using a Bruker 950 MHz NMR spectrometer.

935 (e) Analysis of the titration experiments monitored by 1D <sup>1</sup>H-NMR spectroscopy of β-arrestin-  
936 1 F388TMSiPhe (3d). The curve was fitted to the nonlinear regression equation  $y=B_{\max}[X]/$   
937  $(K_D+[X])$ , according to the scatchard plot analysis (fig. S9). The  $K_D$  value was calculated at  
938  $6.9\pm 0.2 \mu\text{M}$  ( $R^2=0.99$ ).

939

940

941

942

943 **Figure. 4. Regulation of the conformational changes of the β-arrestin-1 polar core by**  
944 **different β2AR ligands.**

945 (a) Cartoon illustration of two distinct interaction modes between GPCRs and β-arrestin-1  
946 (hanging mode and snug mode). The phosphorylated C-tail and transmembrane core of the  
947 receptor were each able to independently stimulate arrestin activation. After activation, the N-  
948 and C-domains of β-arrestin-1 underwent approximately 20 degrees of rotation. The polar core  
949 of β-arrestin-1 is hypothesized to be a critical stabilizer of the inactive state, and introduction  
950 of the probe at H295, which is close to this key region, enables detection of conformational  
951 changes in the polar core in response to the GPCR activation.

952 (b). Structural comparison of the H295 position in inactive β-arrestin-1 (PDB: 1G4M), the  
953 V2Rpp/ β-arrestin-1 complex (PDB: 4JQI) and the rhodopsin/arrestin complex (PDB: 5W0P).  
954 The inactive β-arrestin-1 structure is depicted in gray; the V2Rpp/β-arrestin-1 complex is in  
955 green; and the rhodopsin-arrestin complex is in red. The two active arrestins have similar  
956 conformations at the H295 position, differing significantly from the pose in the inactive arrestin  
957 structure.

958 (c) 1D <sup>1</sup>H NMR spectra of β-arrestin-1–H295-TMSiPhe in response to titration with V2Rpp.  
959 Two distinct peaks were observed. With increasing concentrations of V2Rpp, the peak at 0.25  
960 ppm decreased (representing the S1 state), whereas a new growing peak was observed at 0.15  
961 ppm (representing the S2 state).

962 (d) 1D <sup>1</sup>H NMR spectra of β-arrestin-1 H295TMSiPhe alone or the ppβ2V2R/β-arrestin-1  
963 H295TMSiPhe/Fab30 complex with or without different ligands and the chemical structures of  
964 the ligands used in the current study. After incubation with the phospho-β2AR-V2-tail  
965 (ppβ2V2R) and formation of the receptor-arrestin complex, a new NMR signal appeared at 0.07

966 ppm (designated S3), and the intensity of the S1 peak decreased. When incubated with different  
967  $\beta$ 2AR ligands before formation of the pp $\beta$ 2V2R- $\beta$ -arrestin-1/Fab30 complex, the S3 state  
968 signal intensity of the complex was positively correlated with effects of the ligands on the  
969 activation of downstream effectors, such as arrestin. BI, BI-167107; ISO, Isopreteronol; Clen,  
970 Clenbuterol; Salm, Salmeterol; Alp, Alprenolol; ICI, ICI-118551. The buffer used for the  
971 experiment contained 20 mM HEPES, 150 mM NaCl, 0.01% LMNG, 0.002% CHS, and 10%  
972 D2O (pH 7.5 at 25°C).

973 (e) Best-fit linear correlation of the peak area representing the amount of the S3 state in the  
974 presence of different ligands, with the ligand efficacy for receptor internalization from the  
975 BRET experiment in vivo. See fig. S17 for details.

976 (f) Best-fit linear correlation of the peak area representing the amount of the S3 state in the  
977 presence of different ligands, with the ligand efficacy for separation of the receptor  
978 transmembrane III and VI from the TRIQ experiment in vitro<sup>52</sup>. See fig. S18 for details.

979

980

981

982

983

984 **Figure. 5. G $\alpha$ -CT competition experiments confirmed the essential role of the 7TM core**  
985 **of the receptor in mediating the ligand-regulated conformational change in  $\beta$ -arrestin-1.**

986 (a) Schematic diagram of the interaction between GPCRs and  $\beta$ -arrestin-1 in the presence of  
987 excess G $\alpha$  C-terminus (G $\alpha$ -CT), which has been described in previous reports<sup>55</sup>. The interaction  
988 between  $\beta$ -arrestin-1 and the GPCR TM core was abolished via steric hindrance by G $\alpha$ -CT.  $\beta$ -  
989 Arrestin-1 still interacts with the phosphorylated GPCR C-terminal tail and thus forms a  
990 complex with the receptor.

991 (b) ISO/pp $\beta$ 2V2R/ $\beta$ -arrestin-1/Fab30 complex formation was not disrupted by G $\alpha$ -CT in a size-  
992 exclusion assay. The similar SEC profile observed with or without G $\alpha$ -CT suggests that G $\alpha$ -CT  
993 did not disrupt the ISO/pp $\beta$ 2V2R/ $\beta$ -arrestin-1/Fab30 complex. Size-exclusion chromatography  
994 experiments were performed on an AKTA Purifier equipped with a Superdex 200 (10/300GL)  
995 column. Black: ISO/pp $\beta$ 2V2R/ $\beta$ -arrestin-1-H295TMSiPhe/Fab30 complex, green:  
996 ISO/pp $\beta$ 2V2R/ $\beta$ -arrestin-1-H295TMSiPhe/Fab30 complex mixed with the 200  $\mu$ M G $\alpha$ -CT.

997 (c) 1D <sup>1</sup>H NMR spectra of  $\beta$ -arrestin-1-H295TMSiPhe in the presence of G $\alpha$ -CT. The  
998 transformation from S1 to S3 induced by the ISO/pp $\beta$ 2V2R/ $\beta$ -arrestin-1/Fab30 complex was  
999 significantly weakened by the addition of G $\alpha$ -CT, suggesting the observed S3 state reduction  
1000 was mainly due to the elimination of the receptor core interaction with  $\beta$ -arrestin-1 by the  
1001 binding of G $\alpha$ -CT.

1002 (d) Schematic diagram of the competing experiments of the pp $\beta$ 2V2R/ $\beta$ -arrestin-1 complex

1003 disrupted by the presence of excess V2Rpp.  $\beta$ -Arrestin-1 dissociated from the phosphorylated  
1004  $\beta$ 2V2R due to competition with V2Rpp.

1005 (e) ISO/pp $\beta$ 2V2R/ $\beta$ -arrestin-1/Fab30 complex formation was disrupted by incubation with  
1006 excess V2Rpp in a size-exclusion assay. Black: ISO/pp $\beta$ 2V2R/ $\beta$ -arrestin-1-  
1007 H295TMSiPhe/Fab30. Red: ISO/pp $\beta$ 2V2R/ $\beta$ -arrestin-1-H295TMSiPhe/Fab30 complex mixed  
1008 with 200  $\mu$ M V2Rpp. The red peak can be simulated by two components, which are as follows:  
1009 the blue curve represents the SEC of pp $\beta$ 2V2R alone, and the pink curve represents the  
1010 V2Rpp/ $\beta$ -arrestin-1-H295TMSiPhe complex.

1011 (f) 1D  $^1$ H NMR spectra of  $\beta$ -arrestin-1 H295TMSiPhe in the presence of V2Rpp. The  
1012 incubation of the V2Rpp with the ISO/pp $\beta$ 2V2R/ $\beta$ -arrestin-1-H295TMSiPhe/Fab30 complex  
1013 caused no significant change in the S3 state, but caused a shift of the S1 state to the S2 state. c  
1014 or f) The data collection buffer used for the experiments contained 20 mM HEPES, 150 mM  
1015 NaCl, 0.01% LMNG, 0.002 CHS, and 10% D2O (pH 7.5 at 25°C).

1016

1017

1018

1019 **Figure. 6. Monitoring the conformational states of site 285 of  $\beta$ -arrestin-1 in response to**  
1020 **different  $\beta$ 2AR ligands.**

1021

1022 (a). Structural comparison of the R285 position in inactive  $\beta$ -arrestin-1 (PDB: 1G4M) and the  
1023 corresponding R291 position in the rhodopsin/arrestin complex (PDB: 5W0P). The active  $\beta$ -  
1024 arrestin-1 structure is depicted in gray, and the rhodopsin/arrestin complex is in red. The  
1025 activation of arrestin by a receptor led to a highly solvent-exposed configuration at the R285  
1026 position of  $\beta$ -arrestin-1, as suggested by the crystal structures.

1027 (b) 1D  $^1$ H NMR spectra of  $\beta$ -arrestin-1 R285TMSiPhe activated by pp $\beta$ 2V2R with or without  
1028 different ligands. After incubation with pp $\beta$ 2V2R, multiple new NMR signals appeared  
1029 between 0.04 ppm to 0.10 ppm, which are designated as R0 (0.09ppm), R1a (0.065ppm), R1b  
1030 (0.068 ppm), R2 (0.05 ppm), from low field to high field. The buffer used for the experiment  
1031 contained 20 mM HEPES, 150 mM NaCl, 0.01% LMNG, 0.002 CHS, and 10% D2O (pH 7.5  
1032 at 25°C).

1033 (c) Bar graph representing the population (simulated peak area) of each NMR peak for each  
1034 ligand condition. The values are also tabulated in fig. S21.

1035

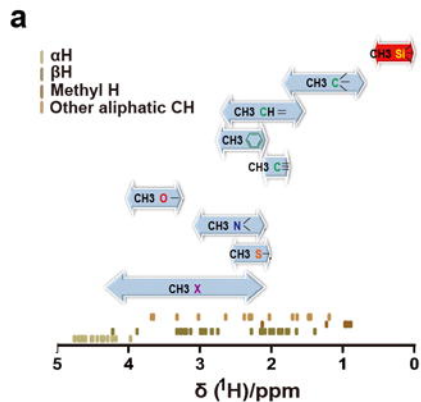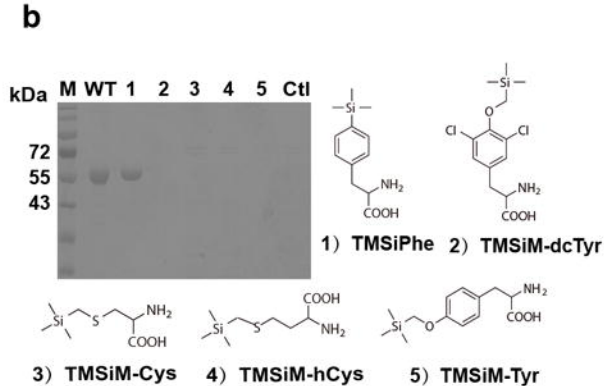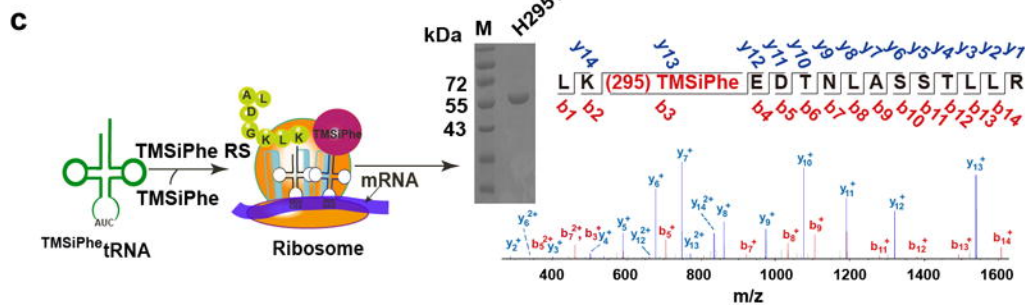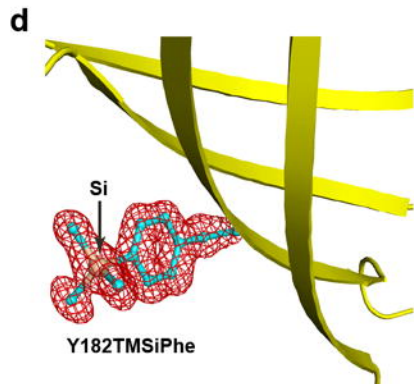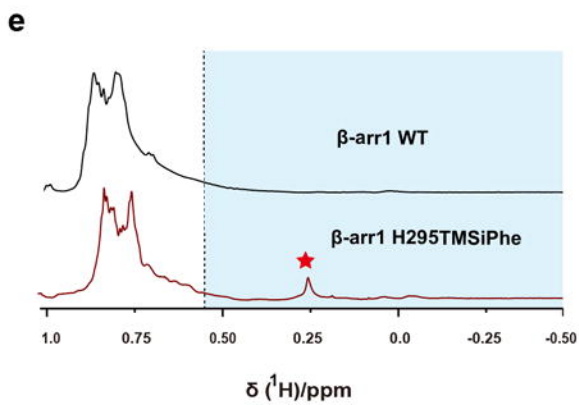

a

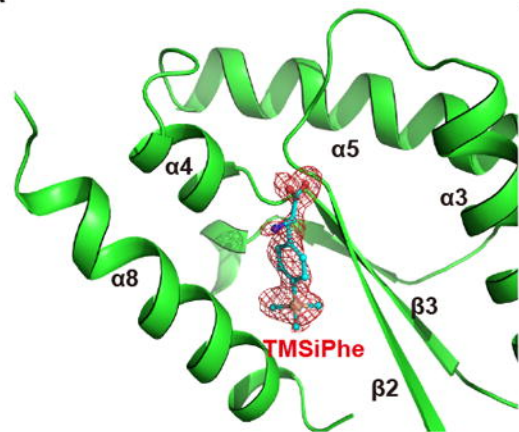

b

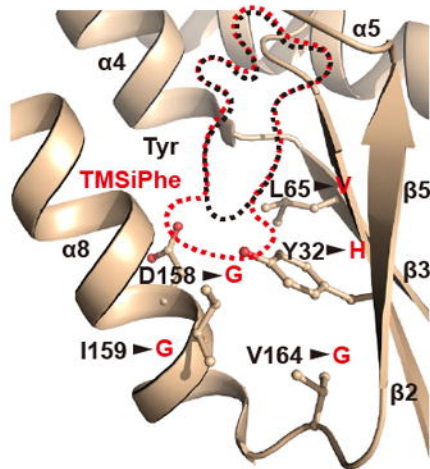

c

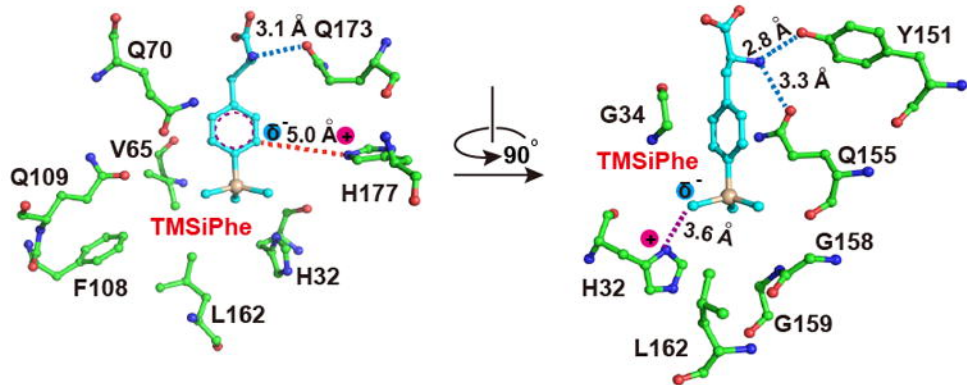

d

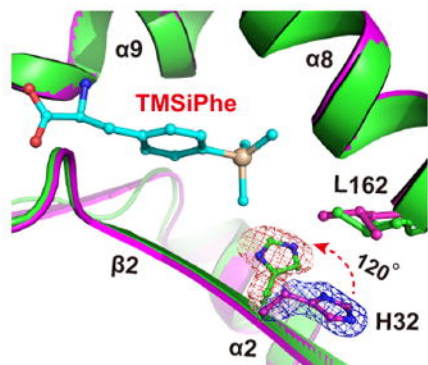

**a**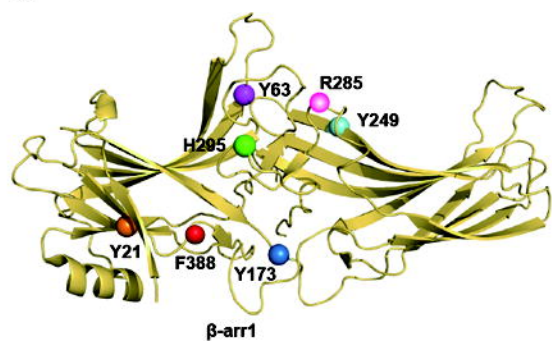**b**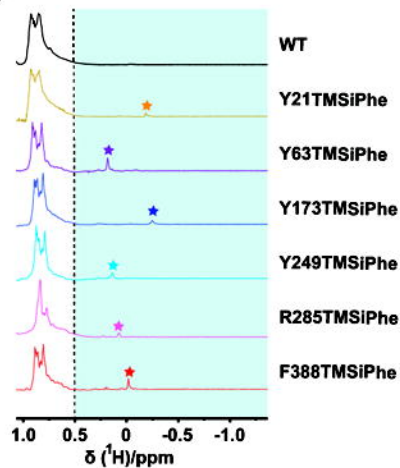**c**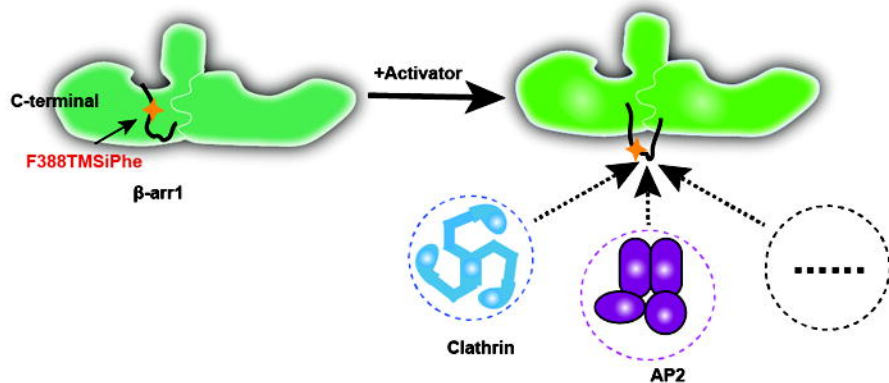**d**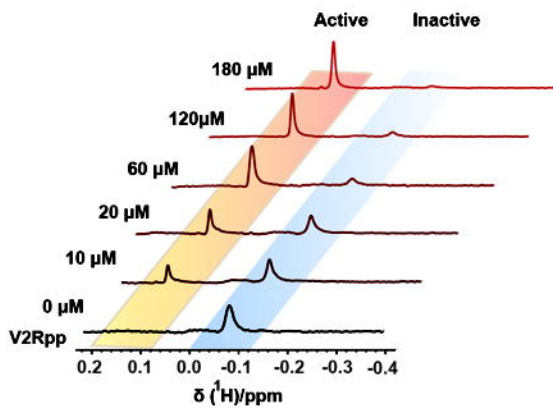**e**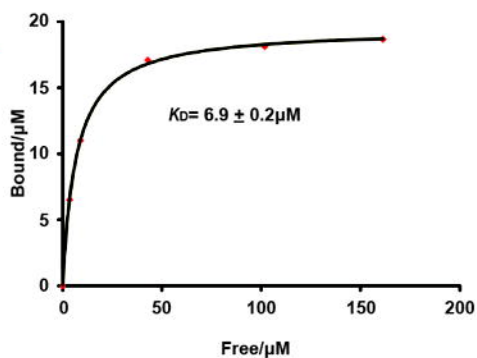



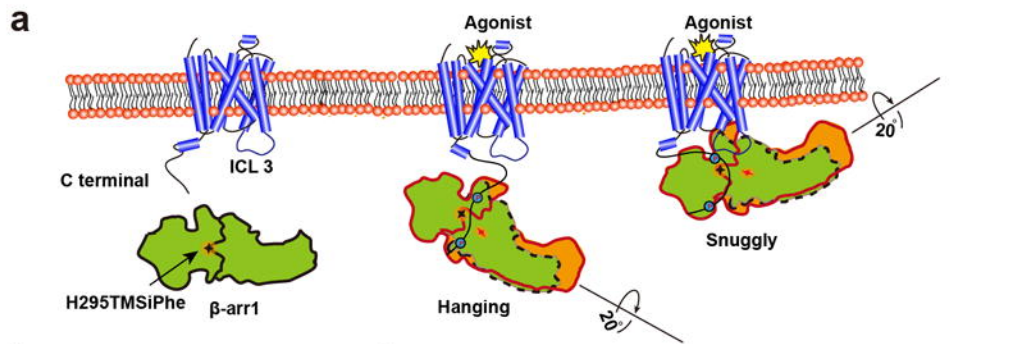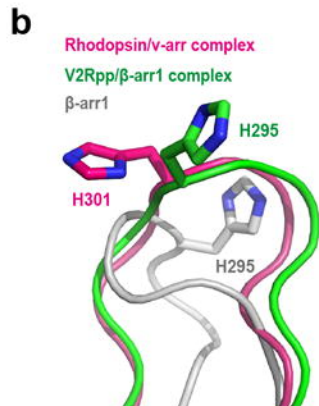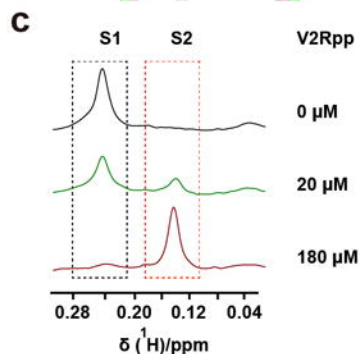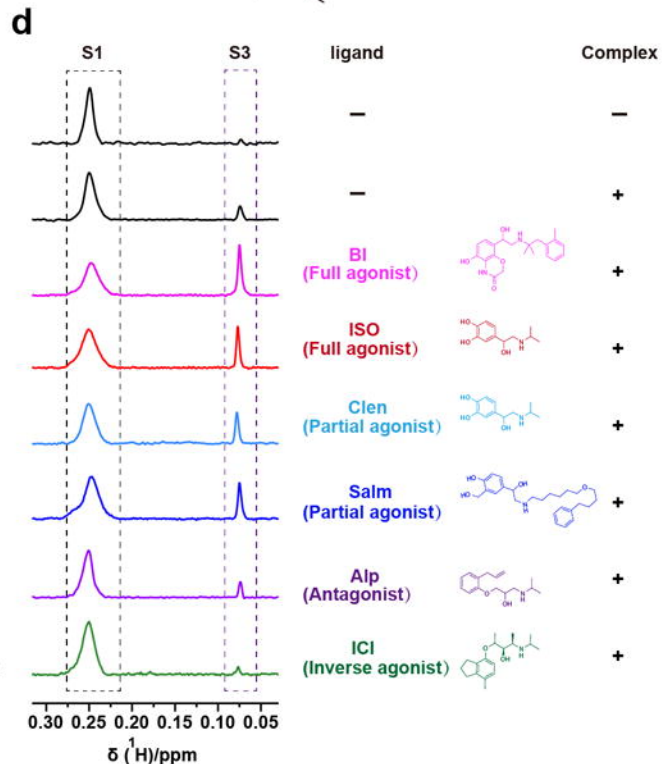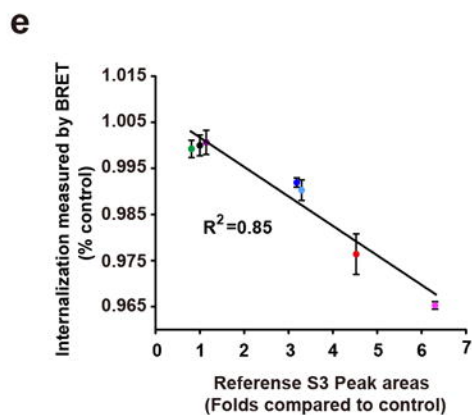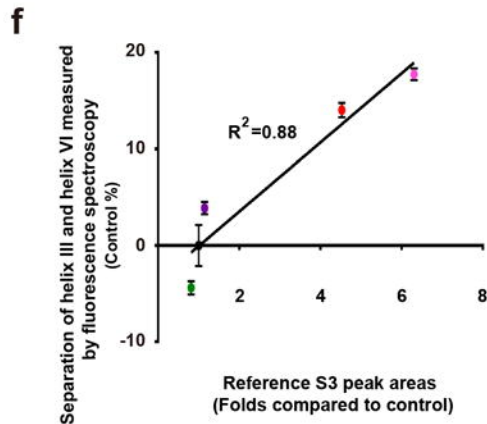

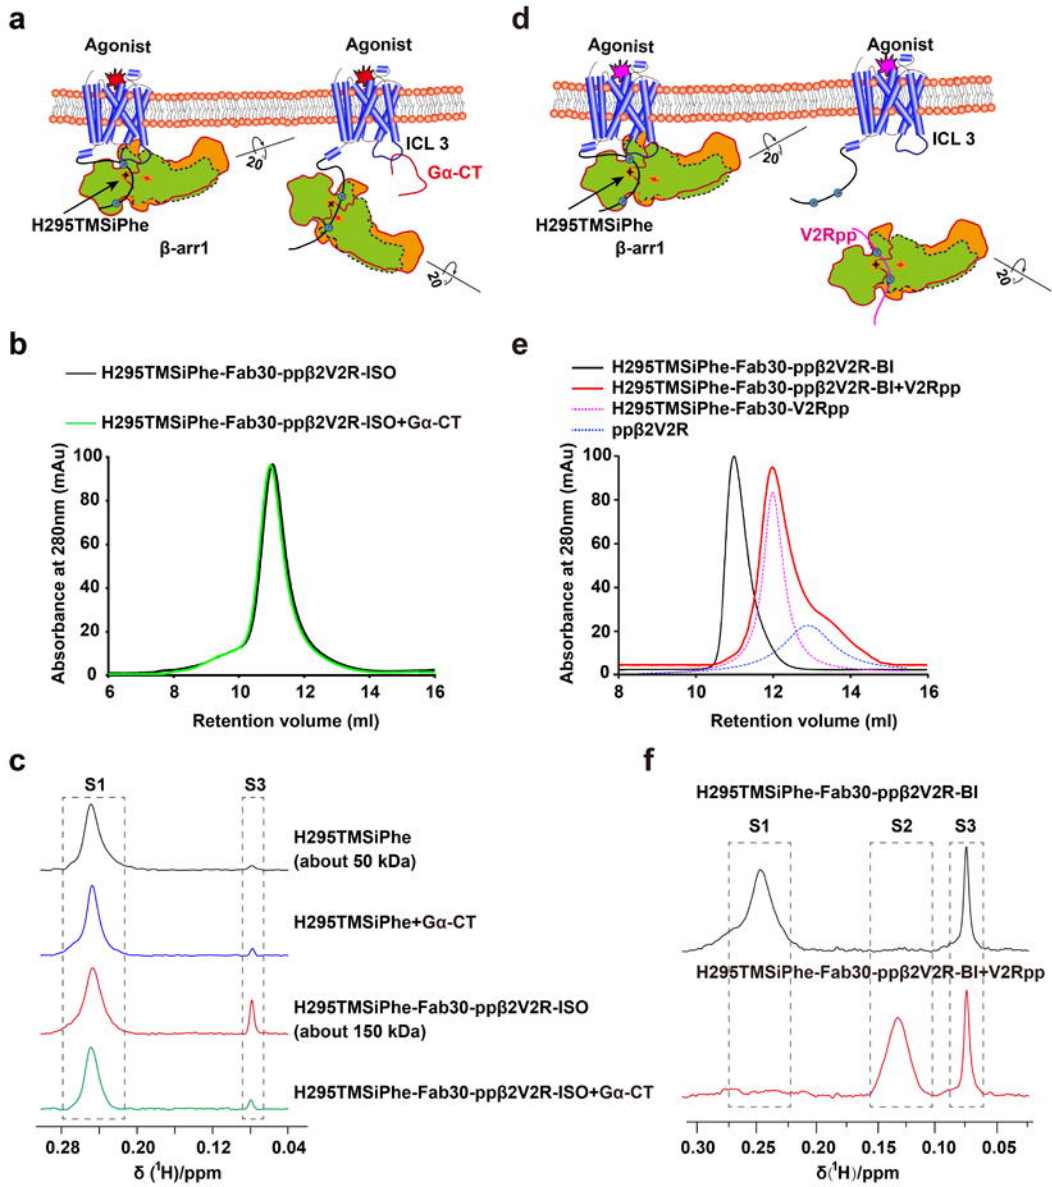

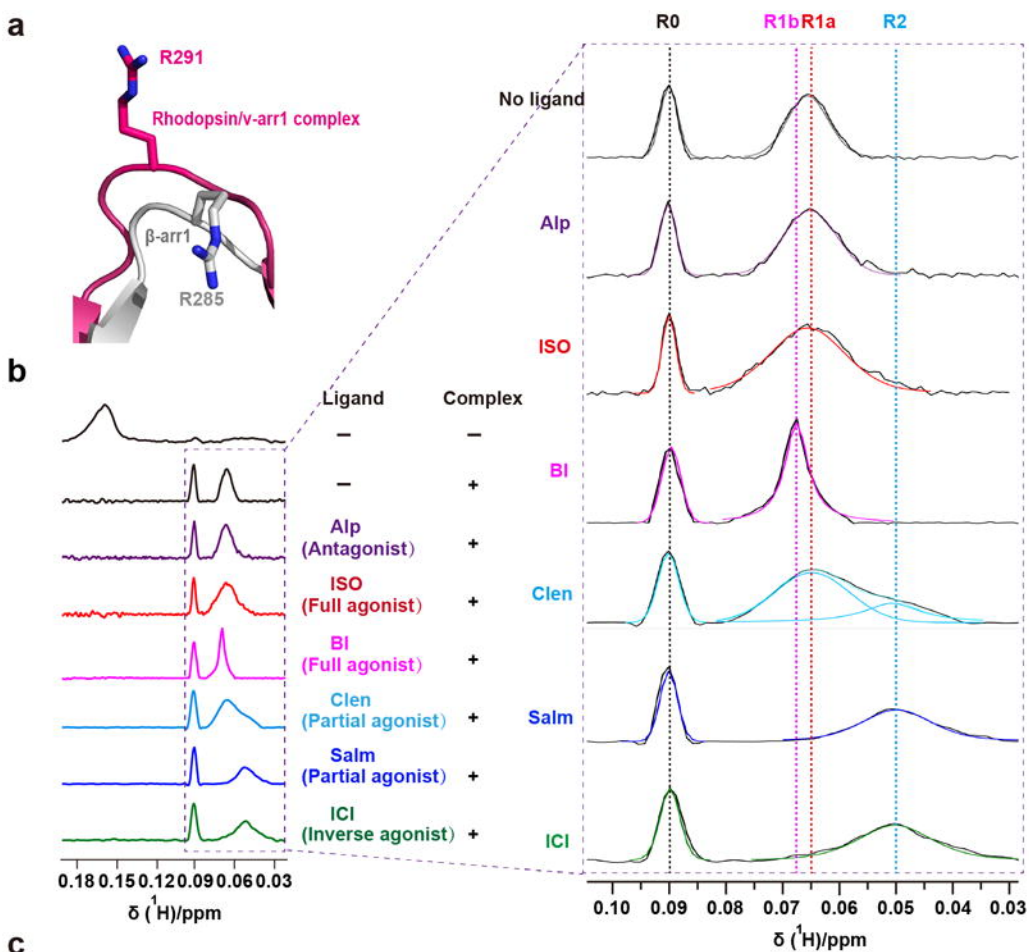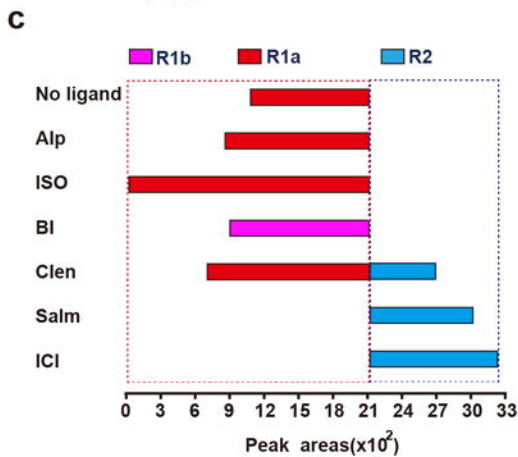

Source: https://www.biorxiv.org/content/biorxiv/early/2020/01/12/2019.12.18.873729.full.pdf
